1 **Title:** A 117 year retrospective analysis of Pennsylvania tick community dynamics

2

3 Damie Pak, [dkp1577@psu.edu](mailto:dkp1577@psu.edu),

4 Ecology Graduate Group

5 The Pennsylvania State University

6 W-234A Millennium Science Complex

7 University Park, PA 16802

8

9 Steven B. Jacobs, [sbj2@psu.edu](mailto:sbj2@psu.edu),

10 Pennsylvania State University

11 Department of Entomology

12 501 ASI Building

13 University Park, PA 16802

14

15

16 Joyce M. Sakamoto\*, [jms1198@psu.edu](mailto:jms1198@psu.edu),

17 The Pennsylvania State University

18 W-104 Millennium Science Complex

19 University Park, PA 16802

20

21 \*Corresponding author

22

## 1 **Abstract**

## 2 **Background**

3 Tick-borne diseases have been increasing at the local, national, and global levels. Researchers  
4 studying ticks and tick-borne disease need a thorough knowledge of the pathogens, vectors,  
5 and epidemiology of disease spread. Three surveillance approaches are commonly used to  
6 provide insight into tick-borne disease risk: human disease case surveillance, active tick  
7 surveillance, and passive tick surveillance. Long-term passive surveillance can provide up-to-  
8 date data on the spatial variability and temporal dynamics of ectoparasite communities and  
9 shed light into the ecology of rarer tick species. We present a retrospective analysis on  
10 compiled data of ticks from Pennsylvania over the last 117 years.

11

## 12 **Methods**

13 We compiled data from ticks collected during tick surveillance research, and from citizen-  
14 based submissions to the Penn State University Department of Entomology (PSUEnt).  
15 Specimens were deposited at the PSUEnt arthropod collections that eventually became The  
16 Frost Entomological Museum. While most of the specimens were submitted by the public, a  
17 subset of the data were collected through active methods (flagging or dragging, or removal of  
18 ticks from wildlife). We analyzed all data from 1900-2017 for tick community composition, host  
19 associations, and spatio-temporal dynamics.

20

## 21 **Results**

22 In total there were 4,491 submission lots consisting of 7,132 tick specimens. Twenty-four

1 different species were identified, with the large proportion of submissions represented by five  
2 tick species. We observed a shift in tick community composition in which the dominant species  
3 of tick (*Ixodes cookei*) was overtaken in abundance by *Dermacentor variabilis* in the early 1990s,  
4 and then replaced in abundance by *I. scapularis*. We analyzed host data and identified overlaps  
5 in host range amongst tick species, suggesting potential hubs of pathogen transfer between  
6 different tick vectors and their reservoir hosts.

7

## 8 **Conclusions**

9 We highlight the importance of long-term passive tick surveillance in investigating the ecology  
10 of both common and rare tick species. Information on the geographic distribution, host-  
11 association, and seasonality of the tick community can help researchers and health-officials to  
12 identify high-risk areas.

13

14 **Keywords:** ticks, passive surveillance, museum collections, community composition

15

16

## 17 **Background**

18

19 The Centers for Disease Control reported a 3.5x increase in vector-borne diseases in the USA  
20 between 2004–2016, with 76.5% of cases caused by tick-borne pathogens [1]. The increase in  
21 tick-borne disease is attributed to multiple abiotic and biotic factors. Changes in geographic  
22 variability and the temporal dynamics of tick species may influence tick-borne disease

1 outcomes. Several endemic tick species have been expanding into new habitats across North  
2 America, posing novel risks to local communities [2]. Although there are many tick-borne  
3 pathogens, the vast majority of tick-borne disease cases are caused by *Borrelia burgdorferi*  
4 [1,3], the main etiological agent of Lyme disease in the USA. Pennsylvania has had the highest  
5 number of total Lyme disease cases since 2000, with increasing numbers of annual cases  
6 across several counties (Figure 1).

7  
8 Surveillance can be a powerful tool for detection of introduced species (transient or  
9 established), emergent arthropod-borne pathogens, and disease risks due to increases or  
10 changes in vector community composition. Active tick surveillance approaches such as  
11 dragging, flagging, CO<sub>2</sub>-trapping, or live animal capture, can be very effective for assessing tick  
12 load by habitat [4,5]. However, active surveillance is labor-intensive, costly, and difficult to  
13 implement over a wide geographic area. Passive surveillance, in which citizens submit ticks for  
14 identification and/or pathogen testing, is more cost-effective and less labor-intensive and can  
15 provide insight into ectoparasite abundance, host associations, or habitat associations across a  
16 wider geographic area [6]. Even when tick samples may be in less-than-ideal conditions (e.g.  
17 missing taxonomically diagnostic ), or data, citizen-submitted tick can accurately represent  
18 tick encounter frequency and potential risk of tick-borne disease exposure [7].

19  
20 Passive surveillance data collected over decades may reveal spatio-temporal changes in  
21 ectoparasite communities [8]. Data such as spatial distribution and occurrence of both  
22 abundant and rare species of ticks can be correlated with landuse (e.g. habitat loss,

1 fragmentation, management), fluctuating environmental conditions, or changes in human or  
2 animal behavior (e.g. encroachment may bring reservoir hosts such as groundhogs in closer  
3 proximity)[9,10]. Additionally, long-term surveillance data can also reveal shifts in temporal  
4 dynamics of tick populations and communities [2]. The seasonality of known tick species have  
5 been described, but year-to-year distribution of tick species may be influenced by inter-annual  
6 variability (e.g. local climate) and biotic factors (e.g. local reservoir species abundance). These  
7 data can be used to create predictive models that accurately measure risks of tick-borne  
8 zoonotic agents.

9  
10 We present a retrospective analysis of tick collection data in Pennsylvania from the early 1900s  
11 to June of 2017. Some of the data prior to 1968 had been published in a USDA report on ticks  
12 from Pennsylvania, but were presented in a format that included anecdotes and overall  
13 percentages rather than raw number breakdowns by species (Snetsinger 1968). In this  
14 manuscript we revisit these specimens and utilize the raw data from both these specimens  
15 (1900-1960s) as well Pennsylvania ticks submitted from 1968-June 2017 to identify shifts in tick  
16 community composition, phenological patterns, and host associations. We used our database  
17 to map the distribution of major tick species at the county level, investigate tick community  
18 spatiotemporal dynamics, and explore host and vegetation associations by tick species.

19

## 20 **Methods**

21

## 22 **Study locations**

1  
2 The state of Pennsylvania (PA) is located in the mid-Atlantic region of the United States  
3 (latitude: 39° to 42°N and longitude: -80° to -74° W). The climate varies across Pennsylvania  
4 depending on the region and altitude, but it typically consists of hot, humid summers and cold  
5 winters with heavy snowfalls in certain areas. The majority of Pennsylvania's land-use is  
6 dedicated to agriculture (both croplands and pastures), forestland, and dense urban areas.  
7 There have been significant changes in the human populations of PA from 1960 to 2010, but a  
8 large proportion of the PA population has remained heavily clustered around Philadelphia and  
9 Pittsburgh, which are located in south-eastern and in south-western PA respectively (Figure 2).  
10 While most specimens were collected within state boundaries, a few were declared from  
11 people either visiting or returning from visiting other states. Tick specimens identified as  
12 species that are not commonly found in Pennsylvania were later discovered to have been  
13 imported or on exotic animals. These non-PA data were not included in state-wide analyses,  
14 but were included in the Supplemental Tables (Table S1).

15

## 16 **Submissions**

17

18 The PSU Frost Entomological Museum (hereafter 'Frost Museum') houses arthropod samples  
19 collected by researchers, teaching collections, and samples submitted by the public for  
20 identification. Although some of these samples date as far back as the late 1800s, we only  
21 present our analysis of the tick specimens from 1900 to June 2017. Because tick samples were  
22 submitted to the Department of Entomology or the Frost Museum over a period of 117 years,

1 they represent multiple collection/submission periods (early 1900–1959, 1960s, 1970–1988,  
2 Tick Research Lab (TRL) submissions from 1990–1993, and 1995–present). Two public  
3 campaigns account for the majority of the specimens. The first campaign (between 1963-1967)  
4 was conducted by Dr. Robert Snetsinger. Dr. Snetsinger collected approximately 500 ticks  
5 using a combination of dragging, sweeping, live animal trapping, and roadkill examinations of  
6 mammals and birds to assess tick abundance in localized areas (Snetsinger, 1968). He enlisted  
7 the help of the public through advertisements in radio, television, and newspapers to obtain  
8 700 additional specimens (Snetsinger, 1968). A second funded campaign dedicated to  
9 estimating tick abundance and species diversity was launched by Steven B. Jacobs (second  
10 author) from 1990-1993 (TRL). In total 1357 submission lots made up of 3561 tick individuals  
11 were contributed by members of the public or by physicians requesting identification.  
12  
13 Ticks submitted prior to 1960 reflect the sporadic nature of citizen-based submissions. An active  
14 advertisement campaign was used to enlist the help of citizens in the 1960s and again in the  
15 early 1990s. Subsequently, post-funding submission rates decreased in volume, but tick  
16 submissions are still received regularly by PSU Entomology for identification. Data from the  
17 ticks submitted prior to 1989 were identified by museum staff and stored in alcohol at the Frost  
18 Museum. Submissions from the general public received from 1989 until June of 2017. TRL  
19 submissions were identified by SBJ and stored in alcohol. All data were combined into a single  
20 dataset for our analyses. We compiled these data to identify how species abundance have  
21 changed over the years. We defined a submission lot ('submission') as a vial or lot containing  
22 one or more ticks. For analysis of host-association, we used "submissions" versus total tick

1 counts by host. We chose to use this more conservative measure rather than the numbers of  
2 ticks submitted to avoid a skew in abundance by host. For example, a submission lot of 1 tick  
3 versus 50 ticks from a host were both treated as one 'submission'. For analysis on the  
4 distribution of tick species over time, we used total tick counts.

5

## 6 **Identification**

7

8 Ticks were morphologically identified to species and life stage using the following taxonomic  
9 keys: Argasidae, Ixodidae east of the Mississippi, *Dermacentor*, nymphal *Ixodes*, and nymphs of  
10 *Amblyomma* [11–17]. Identification of samples to species is crucial since at least 3 *Dermacentor*  
11 species, 3 species of *Amblyomma*, and 9 different *Ixodes* species have been reported in  
12 Pennsylvania. If diagnostic characters were missing due to damage to the specimen, the next  
13 level of taxonomic identification was used (e.g. samples with missing mouthparts that were  
14 clearly Prostriata were identified as "*Ixodes* spp."). In a few cases, samples were not identified  
15 beyond "tick" and were designated "Ixodidae" for hard ticks or "Argasidae" for soft ticks.  
16 Difficult-to-identify, or unusual specimens were sent to the National Tick Collection, Georgia  
17 Southern University for confirmation (by Dr. James Oliver at the time of confirmation).

18

## 19 **Spatial distribution of ticks**

20

21 To get an overview of the spatial variability of the tick community from 1900 to 2017, we  
22 summed the total tick counts by species across the counties. Rarer tick species with less than



1 150 individual specimens were grouped by genus. We then plotted the total individuals with a  
2 dot-density map with each dot representing a single individual. As the associated geographic  
3 data for each submission was at the county-level, the placement of the dots within each  
4 county's boundary was randomized.

5

6 We focused on the geographic distribution of the five most abundant species in our database,  
7 which are of significant public health and veterinary importance: *Amblyomma americanum*  
8 (*Linnaeus*), *Dermacentor variabilis* (*Say*), *Ixodes cookei* (*Packard*), *Ixodes scapularis* (*Say*), and  
9 *Rhipicephalus sanguineus* (*Latreille*). Working on the assumption that counties with higher  
10 populations would submit more specimens than less populated counties, we estimated the  
11 incidence rate (the total numbers of individual ticks per 100,000 people). This was done by  
12 adjusting the total tick count of each species by the county's total population. Because we did  
13 not have the county population data for each year, we looked at relevant time periods during  
14 the surveillance program: 1960-1970, 1990-2000, 2000-2010, and 2010-2020. For each time  
15 periods, we used the 1960, 1990, 2000, and 2010 United Census data respectively to calculate  
16 the incidence rate (Figure 2) (U.S. Census data from 1960 to 1990: retrieved from  
17 <https://www.census.gov/population/cencounts/pa190090.txt>). 2000 U.S. Census data: U.S.  
18 Census Bureau; Table DP-1, Census 2000, Profile of General Demographic Characteristics  
19 Summary File 1 using American FactFinder <http://factfinder2.census.gov>, Table retrieved:  
20 July 1, 2017). 2010 US Census data: U.S. Census Bureau; Table DP-1, Census 2010, Profile of  
21 General Demographic Characteristics Summary File 1 using American FactFinder  
22 <http://factfinder2.census.gov>, Table retrieved: July 1, 2017).

1

2 For the tick species with less than 150 submissions across 1900 to 2017, we aggregated the  
3 submissions by genus. We excluded the five major tick species (*Amblyomma americanum*,  
4 *Dermacentor variabilis*, *Ixodes cookei*, *Ixodes scapularis*, and *Rhipicephalus sanguineus*) from this  
5 analysis. We then mapped presence or absence of each genus by county.

6

## 7 **Temporal analysis**

8

9 To investigate how the annual submissions changed over the course of the passive tick  
10 surveillance program, we first aggregated all individual tick specimens by year. Because there  
11 were few submissions in the beginning of the program, we grouped the annual submissions  
12 into decades starting from 1900–1910 (the years included would be from 1900 to 1909) to  
13 2010–2020.

14

15 We analyzed the temporal dynamics of the five most abundant taxa (*A. americanum*, *D.*  
16 *variabilis*, *I. cookei*, *I. scapularis*, and *R. sanguineus*). We did not evaluate total counts by year as  
17 it varied drastically during active campaigning for citizen submissions or introduction of  
18 identification fees. Therefore, we looked at the proportional contribution of each species to  
19 the annual summed counts of the five major species. To detect if there have been any  
20 monotonic trends (*i.e.* gradual shifts in abundance), we ran a non-parametric, two-sided Mann-  
21 Kendall trend test on the yearly proportion of each of the species from 1900–2017.

22

## 1 **Seasonality**

2

3 For analyzing seasonal patterns of submissions in the passive-surveillance program, we looked  
4 at the months of when the tick specimens were received for identification. For some  
5 submissions, there were no dates of when the ticks were found by the citizen, so we used the  
6 date that the specimens were received. We first looked at the frequency of the months in  
7 which the ticks submissions were received for the collective tick community across 1900–2017  
8 and then by decades. We then investigated the seasonality of the five most abundant tick  
9 species individually. For some of the submissions, information of the life-stage (larvae,  
10 nymphs, and adults) was included. We then explored if the distribution of the monthly  
11 submissions for the life-stages for the major tick species.

12

## 13 **Associated data**

14

15 Where available, we utilized host-association data for our analyses. Submissions generally  
16 included date of tick discovery, location, vegetation associated with tick encounter, from  
17 vertebrate the tick was collected (if any), and any additional comments that might provide  
18 further insight. The data on human hosts such as gender and age were not included.

19

## 20 *Vegetation type*

21

22 For a small subset of these data (1989-1990, TRL) the vegetation associated with the tick

1 encounter were also recorded. We defined the dominant vegetation types as brush, forest  
2 (inclusive of mixed, hardwood, and evergreen), pasture (land intended for grazing), managed  
3 (residential or urban landscapes), and ecotone (used broadly here to refer to any zone of  
4 transition between two plant communities). We used R (Version 3.4.1, RStudio version 1.1.383)  
5 to performed a two-way analysis of variance (ANOVA) test to determine whether total tick  
6 counts were dependent on the different types of vegetation by tick species.

7

### 8 *Host Associations*

9

10 Host information was available for many of the tick specimens (combined by family, except for  
11 dog, cat, human, and groundhog). Host data were classified as either domestic or wildlife. We  
12 summarized the host-tick data by summing the total submissions by both the tick species and  
13 the host groups. We constructed a circular network map to visualize the relationships between  
14 tick species and hosts. All host association analyses were done with R (Version 3.4.1, RStudio  
15 version 1.1.383) with the packages 'MannKendall' for the Mann-Kendall test and the 'circlize'  
16 package for chord diagrams of host association mapping [18,19].

17

### 18 *Availability of data and materials section*

19

20 The dataset(s) supporting the conclusions of this article is(are) available in the  
21 passive\_tick\_surveillance\_2018repository,

22 [https://github.com/pakdamie/passive\\_surveillance\\_tick\\_2018/tree/master/MAIN\\_DAT](https://github.com/pakdamie/passive_surveillance_tick_2018/tree/master/MAIN_DAT)

1

## 2 **Results**

3

### 4 *General observations*

5 From 1900 to 2017, PSU Entomology handled a total of 4,491 submission lots consisting of  
6 7,132 tick specimens from twenty-three species (Table 1). There were five species of ticks that  
7 accounted for the majority (91%) of the total number of tick: *Dermacentor variabilis* (n = 3172),  
8 *Ixodes scapularis* (n = 1899), *Ixodes cookei* (n = 897), *Rhipicephalus sanguineus* (n = 332), and  
9 *Amblyomma americanum* (n=196). Other tick species that were represented in at least 100  
10 submissions were *Dermacentor albipictus* (Packard) (n = 107), *Ixodes dentatus* (Marx) (n = 120),  
11 and *Ixodes texanus* (Banks) (n= 111). The remaining ticks had < 100 submissions/species and  
12 included both hard and soft tick species.

13

### 14 **Spatial Analysis:**

15

16 Ticks were submitted from all 67 counties in Pennsylvania (Figure 3). We hypothesized that  
17 more tick submissions would come from areas with higher human populations and as  
18 expected, tick submissions were heavily clustered around Allegheny and Philadelphia County  
19 where Pittsburgh and Philadelphia are located respectively. When we adjusted the total tick  
20 count by county population-decade, we found higher incidence rates in *less* populated  
21 counties. For example, in 1990–2000, the highest incidence rates of *Ixodes scapularis*  
22 submissions were from Elk County (870 individuals per 100,000 population). Neighboring

1 Forest and Cameron counties also had high submissions of *I. scapularis* with 116.64 and 589.97  
2 individuals per 100,000 respectively. Other counties with high *I. scapularis* incidence rates  
3 included Northumberland (299.56 individuals per 100,000), Snyder (198.98 individuals per  
4 100,000), Union (171.31 individuals per 100,000), and Clearfield (99.21 individuals 100,000)  
5 (Figure 4).

6  
7 *Dermacentor variabilis* distribution was largely localized to southern portions of the state, in  
8 1990–2000, the highest proportion of *D. variabilis* submissions came from Greene County, the  
9 most southeastern county of Pennsylvania (865.45 submissions per 100,000). Other southern  
10 counties with significantly high rates included Fulton County (350.60 per 100,000) and Franklin  
11 County (117.26 per 100,000).

12  
13 *Ixodes cookei* was more evenly distributed throughout Pennsylvania, although similar to *Ixodes*  
14 *scapularis*, it was more highly abundant in the northern counties. In 1990-2000, Forest County  
15 had the highest incidence rates of *Ixodes cookei* with 80.87 per 100,000. *R. sanguineus* and *Am.*  
16 *americanum* had very few submissions and their distribution was mostly scattered across  
17 Pennsylvania.

18  
19 Multiple species within the genera *Ixodes* and *Dermacentor* were widely distributed across  
20 Pennsylvania (*I. scapularis*, *I. cookei*, *D. andersoni*, and *D. albipictus*) (Figure 5). Other species in  
21 the genera *Amblyomma*, *Argas*, *Carios (Ornithodoros)*, and *Haemaphysalis* were not as widely  
22 distributed, possibly because these species are not commonly encountered or because the

1 specimens were introduced from their native geographic ranges. For example, we only had  
2 four submissions of *Argas cooleyi* and *A. persicus*.

3

#### 4 **Temporal**

5

#### 6 ***Temporal shifts in species abundance***

7

8 Prior to the 1990s, the majority of the tick submissions were identified as *I. cookei* and *R.*  
9 *sanguineus* (Figure 6). The spike in the number of submissions 1990 were largely due to *D.*  
10 *variabilis*, but gradually, *I. scapularis* became the dominant taxon submitted. Results from the  
11 Mann-Kendall test supports these observations with an upward trend in the *I. scapularis* counts  
12 ( $\tau = 0.288$ ,  $p = 0.02$ ) and a significant downward trend in *D. variabilis* ( $\tau = -0.408$ ,  $p = 0.002$ ).  
13 The Mann-Kendall also indicate that the proportional contributions of *I. cookei* ( $\tau = -0.607$ ,  $p$   
14  $< 0.001$ ) and *R. sanguineus* ( $\tau = -0.377$ ,  $p = 0.005$ ) to the total count have also significantly  
15 shifted over a century.

16

#### 17 **Seasonality**

18

19 Overall, we find that the majority of tick specimens were received in the months between April  
20 and July with May being the month with the highest proportion of tick submissions (Figure 7).  
21 However, there was significant variation in the seasonality of the submissions during the  
22 program (Figure 8).

1  
2 Submissions of *D. variabilis*, *Am. americanum*, *I. cookei* and *R. sanguineus* were most abundant  
3 during the period between May and July. By species, *D. variabilis* and *Am. americanum* were  
4 most abundant from March to October. *I. cookei* and *R. sanguineus* samples were submitted  
5 throughout the year, but had peak abundance in June. Samples of *I. scapularis* were also  
6 submitted year-round, but the peak abundances were bimodally distributed, with a large peak  
7 in between May to June, and a second peak between October to November. Our data tracks  
8 these peaks, although nymphal *I. scapularis* were also submitted during late spring to early fall.

9

#### 10 *Life stage abundance by species*

11

12 There were 6,233 specimens for which the lifestage data were available. Four percent of the  
13 submissions were larvae (n=237), 20% of the were nymphs (n = 1271), and 75% of the  
14 submissions were adults (n = 4725).

15

16 For *Dermacentor variabilis*, the submissions included 32 larvae, 33 nymphs, and 3059 adults  
17 from 1960 to 2017(Figure 9). While we only had larval specimens from 1990–2000, we found  
18 that the peak submissions were in September (90%). For the nymphal submissions, there was  
19 a more unimodal distribution with the peak centered around June. Finally, the adult  
20 submissions of both 1990–2000 and 2000–2010 showed similar patterns with the peak in  
21 submissions between May and June.

22



1 Before 1990, there were only six submissions of adult *Ixodes scapularis* (Figure 10). In 1990–  
2 2000, the nymphal and larval submissions show a unimodal pattern with the highest  
3 proportion of submissions received in June. For the adult submissions during this decade, there  
4 are prominent bimodal peaks in May and October with similar proportion of submissions  
5 received in both seasons. There were fewer submissions in 2000–2010 with only 23 larvae, 2  
6 nymphs, and 486 adults. The monthly submissions of both the larvae and adults in this decade  
7 were consistent to the seasonal patterns found in 1990–2000. Finally, in 2010–2020, the adult  
8 submissions (n = 31) show a shift with a number of submissions found earlier in March.  
9  
10 The majority of *Ixodes cookei* submissions were identified as nymphs with a total of 521  
11 submissions followed by adults (n = 182) and larvae (n= 88) (Figure 11). Submission patterns  
12 indicate that *Ixodes cookei* specimens are found all year-round specifically in the nymphal  
13 stages (Figure 11). Across all life-stages, we see that the distributions are unimodal with peaks  
14 in early summer between May and June.  
15  
16 There were a total of 154 of 183 specimens identified to lifestage for *Amblyomma americanum*  
17 (17 larvae, 64 nymphs, and 73 adults). Between 1990 and 2010, the nymphal and adult  
18 submission patterns were similar with peak submissions occurring between June and July.  
19  
20 The only decade with high enough counts of *Rhipicephalus sanguineus* to evaluate seasonal  
21 variation was the 1960s. In total, we received 59 adult submissions, 17 nymphs, and no larvae.

1 Submissions were mostly from July and August. The nymphs were submitted in October and  
2 adults were submitted between February and September.

3

#### 4 **Vegetation type**

5

6 There were 677 submissions for which we had data on tick associations with vegetation type  
7 (from 1989 to 1990). The large proportion of vegetation data was of ecotone ( $n = 190$ ) which  
8 made up 27 percent of the data. This was followed by forest ( $n = 178$ ) and managed ( $n=176$ ).  
9 ANOVA indicated that habitat was a significant predictor for the tick counts ( $F = 3.1997$ ,  $p =$   
10  $0.007$ ). We found that ecotone had a weakly significant correlation with tick abundance ( $F =$   
11  $2.097$ ,  $p = 0.036^*$ ) and using a pairwise Tukey comparisons in the vegetation types, the greatest  
12 difference in the vegetation type was between managed and ecotone.

13

#### 14 **Host association**

15

16 One of our assumptions about passive surveillance is that there is an inherent bias toward  
17 humans as the hosts, particularly since most specimens submitted by the humans on  
18 themselves, their pets, or other domestic animals. Figure 12 is a visual representation of the  
19 quantitative data on ticks associated with different hosts. By far the majority of submissions  
20 were associated with humans and their domestic animals and this reflects the fact that many  
21 of the specimens in our collection were submitted by people on themselves or their pets  
22 (Figure 12). Of 4491 submissions from PA, there were 2662 attached to humans, 666 were

1 associated with cats or dogs, 20 from other domestic animals, and 168 were submissions  
2 pooled from multiple hosts (mixed). There were 11 additional submissions found on various  
3 exotic animals. There were 689 submissions for which there was no host record or the ticks  
4 were not attached to a host. The remaining 275 were found on various wildlife.

5

## 6 **Discussion**

7

8 Our data adds to the current understanding of tick community composition and spatio-  
9 temporal dynamics over 117 years. With the caveat that our dataset contains gaps in years of  
10 submissions, we were able to detect shifts in tick community composition, seasonality, and  
11 host associations that have not been well-documented in a quantitative manner. To our  
12 knowledge this is the first time that these data have been compiled in their entirety and  
13 analyzed in this format. Since 1993 (~25 years) there have been 28 publications on ticks from  
14 Pennsylvania, and 22 of them were focused on *I. scapularis* and/or the microbiota (mostly on  
15 pathogens)[20–48]. Subsets of our data had been reported as percentages or combined with  
16 data from other museums and literature reviews to assess known distribution of one or more  
17 tick species across the state of Pennsylvania [43,49].

18

19 Without any data for comparison of other tick species, we can only speculate why there were  
20 shifts in the abundance of certain tick species. For instance, *I. cookei* abundance was greatest  
21 prior to the 1990s, but has since declined our submission dataset. In contrast, the abundance of  
22 *I. cookei* in the Maine passive surveillance program has been constant, even as *I. scapularis*

1 submissions have increased [8]. It is possible that Pennsylvania *I. cookei* abundance has also  
2 remained relatively stable, but perhaps we lack sufficient power to detect *I. cookei*.

3  
4 Apart from one recent fine-scale analyses on the phenology of *I. scapularis* by Simmons et al  
5 [42], much of the literature on PA ticks reflects presence/absence data of *I. scapularis* and/or  
6 the pathogens they harbor. There have been 2 exceptions: a study of river otters that found 3  
7 female, 1 nymphal and 1 larval *I. cookei* on 3 otters, and a study quantifying the ectoparasites of  
8 bats in Blair County, PA that identified 5 specimens of soft tick *Ornithodoros kelleyi* Cooley &  
9 Kohls [40,28]. Certainly *I. scapularis* warrants the scrutiny it has received, but other tick species  
10 have not been studied closely enough to detect the shifts in tick biodiversity, the potential  
11 causes, or epidemiological consequences of these shifts. Further, neither expanding tick  
12 ranges nor presence of introduced or established species have been closely monitored. Thus,  
13 although we have only recently discovered the presence of the newly invasive longhorn tick (*H.*  
14 *longicornis*) in Pennsylvania, we do not know whether it had been introduced previously. *H.*  
15 *longicornis* is a tick with a wide host range, potentially capable of harboring and transmitting  
16 multiple pathogens, may induced meat allergies, and may be capable of reproducing  
17 parthenogenically [50–52].

18

19 *Temporal comparisons of tick community compositions*

20

1 In the 1960s, PA tick communities consisted predominantly of three species: *I. cookei*, *D.*  
2 *variabilis*, and *R. sanguineus*. The most abundant species at that time, *I. cookei*, is often referred  
3 to as a groundhog tick, but has been known to multiple mammalian hosts and will readily bite  
4 humans and dogs [53]. The second most abundant species, *D. variabilis*, was widely distributed  
5 and eventually became the dominant species submitted over *I. cookei* in the 1990s. By 1991 *D.*  
6 *variabilis* had been identified from all but 4 counties [43]. After 1995, *D. variabilis* annual  
7 submission rates declined as *I. scapularis* submission rates increased. Although we cannot  
8 directly infer a causal negative relationship between these two species from our data, this  
9 pattern was also observed in neighboring Ohio. The Ohio State passive surveillance program  
10 (started in 1978) did not detect *Ixodes scapularis* (=formerly *I. dammini*) until 1989 [54]. At that  
11 time, the dominant species were *D. variabilis* (~97% of submissions) and *Ixodes cookei*  
12 (1.2%)[54]. Between 1989 until 2008, *I. scapularis* accounted for less than 1% of the total  
13 submissions, but after 2009, the abundance began to increase until in 2012, they accounted for  
14 24.8% of ticks submitted to the Ohio Department of Health [55].

15  
16 The fourth most abundant species of note in 1968 was *R. sanguineus*, the Brown Dog tick. *R.*  
17 *sanguineus* originated in Africa, but has since become a cosmopolitan urban pest species found  
18 worldwide in association with humans and their canine companions [56]. Snetsinger suggested  
19 in 1968 that *R. sanguineus* had established breeding populations in Pennsylvania, but according  
20 to our records, we have had very few submissions since then and none since 2002. Since both  
21 *R. sanguineus* and *D. variabilis* are competent vectors of Rocky Mountain Spotted Fever  
22 (RMSF), the recognition of either of these species is important for diagnosis and treatment

1 after a bite (ProMed-mail. Rocky mountain spotted fever - USA (03): (PA) fatal. ProMED-mail  
2 2014; 8 Sept; 20140908.2757657.<http://www.promedmail.org> July 2018 [57].

3

4 The last species that accounted for more than 150 submission lots was *Am. americanum*.

5 Although this species was not common in the 1960s, there was an increase in submissions from  
6 1990s-2000s. Springer et al used predictive modeling to determine that the southern border of  
7 Pennsylvania encompassing the Appalachia Mountains were unsuitable for supporting *Am.*  
8 *americanum*, but that western Pennsylvania might experience expansion from the west [44].

9 We have identified specimens from as recent as October 2016 in our dataset, although we  
10 cannot say for certain whether this specimen represents transient introductions or established  
11 colonies since the lifestage was not available. *Am. americanum* is a competent vector of  
12 ehrlichiosis, tularemia, RMSF, multiple *Borrelia* species (including *B. lonestari*, *B. andersonii*,  
13 and *B. americanum*), and competent vector of heartland virus)[2,58,59]. *Am. americanum* has  
14 also been implicated in inducing meat allergies in certain people [60].

15

16 One additional species of note is *Haemaphysalis leporispalustris* (Packard) (=Hlp), a congeneric  
17 of *H. longicornis*. This species abundantly distributed throughout North America [49,53]. *Hlp* is  
18 often commonly referred to as a rabbit tick, although it will readily parasitize any mammal or  
19 bird and has been known to parasitize humans (Parker et al., 1951; Snetsinger, 1968; Freitas et  
20 al., 2009). It can be of public health concern because of its potential role as a vector of  
21 Tularemia and Rocky Mountain Spotted Fever [49,62]. In 1968 this species was widely

1 distributed throughout the Pennsylvania, but we have no records of this species after 1993.  
2 Since the submissions for tick identification after 1990 were mostly limited to ticks removed  
3 from humans or their domestic animals, there is insufficient power to detect this species.  
4 Farther north and west, *Hlp* is still found parasitizing a wide range of avian and mammalian  
5 hosts [63,64].

6  
7 The seasonality data for the five most abundant tick species inferred by our passive  
8 surveillance data is consistent with previous records of seasonality described by other  
9 researcher [5,42,65,66], demonstrating that these types of passive data contain biologically  
10 meaningful signal.

11

## 12 *Quantifying host association*

13

14 Vector-host associations are important factors for predicting risk of pathogen transmission  
15 and identifying key players in a sylvatic disease cycle. Common names such as the rabbit tick,  
16 deer tick, or dog tick are often used when describing ticks to the public, but can sometimes  
17 lead to misinformation about host preferences. For example, many tick resources for the  
18 public refer to *I. cookei* as the “Groundhog” or “Woodchuck tick” (e.g. CDC  
19 <https://www.cdc.gov/ticks/tickbornediseases/tickID.html>). Yet, previous literature on *I. cookei*  
20 clearly describes it as a cosmopolitan species that parasitizes a wide range of medium-sized  
21 mammals [53,67]. Our data support the observations that this species can be found  
22 parasitizing human, domestic animals, and wild animals. Although *I. cookei* is important as a

1 vector is of the very rare, but potentially fatal Powassan Encephalitis Virus, it is not a  
2 competent vector of *B. burgdorferi* [68,67,69]. It therefore remains a sometimes ignored  
3 species for which little is known about its microbiota (including pathogens, commensals, or  
4 symbionts). Because of its broad host range and co-parasitism with other tick species, *I. cookei*  
5 may be a potential bridge vector that can transmit pathogens from one reservoir host to  
6 another.

7

8 Host associations of more rarely encountered tick species can sometimes lead to incorrect  
9 assumptions about host preferences. While some tick species may be presumed to hold strict  
10 host preferences, they may bite humans if given the opportunity. For instance, *I. dentatus*  
11 biting humans in cabins that had been inhabited by their squirrel hosts in Maine and Vermont,  
12 and *I. marxi* was found (Hall et al., 1991, Lubelczyk et al 2010). In our dataset so-called  
13 “generalist” tick species (*D. variabilis*, *I. scapularis*, *I. cookei*) were found parasitizing a wide  
14 range of vertebrate hosts. Similarly, we found that ‘specialist’ tick species (*I. dentatus*, *I. marxi*,  
15 *I. muris*) that were mostly associated with a single host or limited to host size (e.g. small  
16 mammals or birds). Some species known to be multi-host species, however, were limited to  
17 one host or few in our collections (e.g. *I. texanus* was only found on raccoons, yet it has been  
18 found parasitizing small rodents and medium sized mammals [5,70,71]).

19

20 *Importance of tick species identification*

21



1 Merten and Durden (2000) described 84 tick species naturally occurring in the United States,  
2 40 species of which will are known to bite humans (11 species of soft ticks and 29 hard  
3 ticks)[72]. Nine of the 40 human biting species are classified by the CDC as important vectors  
4 of zoonotic disease website (<https://www.cdc.gov/ticks/tickbornediseases/tickID.html>): 1)  
5 American dog tick (*D. variabilis*), 2) Blacklegged tick (*I. scapularis*), 3) Brown dog tick (*R.*  
6 *sanguineus*), 4) *I. cookei* (groundhog tick), 5) Gulf Coast tick (*A. maculatum*), 6) Lone star tick (*A.*  
7 *americanum*), 7) Rocky Mountain wood tick (*D. andersoni Stiles*), 8) Soft ticks (specifically  
8 *Ornithodoros* spp.), and 9) Western blacklegged tick (*I. pacificus* Cooley and Kohls). In the last  
9 20 years, *Ixodes scapularis* has become the most abundant tick species in Pennsylvania.  
10 Distinguishing *Ixodes* from other genera of ticks is fairly simple, but species level identification  
11 requires more detailed morphological examination, since there are 6 endemic species of *Ixodes*  
12 and 3 exotic species that could potentially be misidentified as *I. scapularis*. More generally,  
13 although many tick species are incompetent vectors of *B. burgdorferi*, they may be vectors  
14 and/or reservoirs of other pathogens/parasites, or acquire pathogens during co-feeding  
15 [5,21,73,74]. It is therefore important to correctly identify tick species, not only for  
16 determination of disease risk, but also because the treatments for the pathogens they transmit  
17 may differ significantly.

18

19 *Finding context for exotic specimens: the hidden gems in retrospective analyses*

20

21 Our data encompasses a large timeframe and includes several collection periods. While such a  
22 rich dataset held much promise, the reality was that cleaning up and standardizing the data

1 into an analyzable format was a laborious task. Additionally, without context, it was difficult to  
2 understand how exotic specimens arrived onto Pennsylvania soil. Much of the literature on the  
3 distribution of ticks other than *I. scapularis* in Pennsylvania was found in lists published either  
4 in before or during 1940s or after the 1990s. Fortunately, we were able to locate a USDA  
5 report on ticks and tick-borne disease by Dr. Robert Snetsinger [49]. In it were explanations for  
6 the presence of exotic specimens, but also contained were snapshots into the PA tick  
7 community composition as well as the public health concerns of tick experts at that time.  
8 Although the report did not have actual counts (only percentages) with associated metadata  
9 (and in fact contained data collected from other museums as well as references to data from  
10 previous papers or unpublished data), we were able to cross-reference the existing tick  
11 specimens from this time period with associated data contained in handwritten notes found at  
12 the Frost. The Snetsinger report provided a snapshot the epidemiological focus of the time  
13 with respect to tick vectors and the pathogens they could spread. For instance, it was known,  
14 but not published at that time, that the rare and deadly Powassan Encephalitis Virus (PEV) was  
15 present in groundhogs in southern PA (Snetsinger, 1968). *I. scapularis* is now responsible for  
16 more arthropod-borne disease outbreaks in the continental US, but in the 1960s *I. scapularis*  
17 populations (which had been decimated by deforestation in the early 1900s) had not yet re-  
18 established a foothold in most of the commonwealth[49,76]. The tick-borne diseases of  
19 concern from 1963 to 1993 were Tularemia (caused by *Francisella tularensis*) and Rocky  
20 Mountain Spotted Fever (caused by *Rickettsia rickettsii*) (Snetsinger, 1968; Snetsinger et al.,  
21 1993).

22

1 In addition to 19 specimens that were from out-of-state, we also identified several exotic tick  
2 specimens within Pennsylvania. One specimen of *Amblyomma cajennense* (the Cayenne tick  
3 generally limited to neotropic regions) was collected from a capybara in 1913 from the  
4 Philadelphia Zoological Garden [49]. A century later, Brazilian researchers documented  
5 spotted fever-infected *A. cajennense* on capybaras [77]. Perhaps if this specimen has been  
6 maintained well enough, we might be able to extract DNA and assay for spotted fever  
7 rickettsial species.

8 Another specimen, a single European species of tick, *I. ricinus* (the castor bean tick), and sister  
9 taxon to *I. scapularis*, was found on lizards in the Pittsburgh Zoo [49]. A third oddity was a  
10 reptile-associated tick, *A. dissimile*, known to be imported through the pet trade (snakes) and  
11 on research animals. In one humorous, but almost hidden anecdote, one of the tick specimens  
12 was described to come from a snake that was used as part of the costume by a “night club  
13 ballerina” [49].

14 Some exotic specimens suggested periodic introduction, but subsequent lack of  
15 establishment. In 1967 there was one specimen of the Gulf Coast Tick (*A. maculatum* (Koch))  
16 identified after being removed from the ear of a child who had never left Pennsylvania  
17 (Snetsinger 1968). At that time, *A. maculatum* was only known from the neotropics and  
18 nearctic regions along the coasts of southern Atlantic states, so the presence of this specimen  
19 was “a mystery” (Snetsinger 1968). We identified 4 additional submissions of this species in our  
20 database since 1968 from 1969, 1990, 1994, and 2004. In the last several decades, the range of  
21 this species has expanded westward into the Mid-west and northward into the Mid-Atlantic on

1 migrating birds, including into neighboring states (Sonenshine 2018). Their establishment  
2 northward has been attributed to climate change, but because they require high humidity and  
3 higher temperatures, what has driven their movement inland and westward is not yet clear. It  
4 is possible that successful breeding populations are more tolerant of cooler and/or drier  
5 conditions, or alternatively, because they are localizing to warmer and/or more humid areas  
6 along riparian ecotones [3]. *Am. maculatum* is a vector of *Rickettsia parkeri*, a mild fever-  
7 causing sickness in the Mid-Atlantic states, but its epidemiological significance is amplified  
8 should it share its rickettsial load to *A. americanum* through co-feeding on the same host [3].

9

10

11 There were two soft ticks that were most either introduced or very rare. The first is *Argas*  
12 *persicus*, an Old World species associated with poultry [78]. This is a species rarely collected in  
13 the United States and it is presumed to have been imported on poultry. The only reported  
14 sightings confirmed by Glen Kohls came from California, Georgia, Maryland, and Pennsylvania  
15 [78–80]. Our two confirmed instances of *A. persicus* from Pennsylvania chickens came from  
16 York and Adams county [78].

17 The other argasid species found was *Argas cooleyi*. *A. cooleyi* is mostly associated with cliff  
18 swallows in southwestern states of the USA, so humans do not normally encounter them  
19 unless they disturb the nests or if the nests are in close proximity to human dwellings [81]. It is  
20 therefore unlikely that this specimen is commonly encountered in Pennsylvania unless  
21 imported by humans or through bird movement.

22

1 *Impact of free versus per-submission charges for tick identification on submission rates*

2

3 Rates of tick submissions from the public varied depending on the extent of advertisement and  
4 whether there was a cost associated with tick identification. In the case of the 1960s  
5 Snetsinger campaign, submission rates were high largely due to a multimedia advertisement  
6 campaign that targeted principally housewives, although other citizens also submitted  
7 specimens during that period. Similarly, during the first year of the TRL campaign, submissions  
8 rates were initial high, but the submission rates declined over the next two years. Subsequent  
9 lack of funding to support a free tick species identification meant that to identifications had to  
10 be done at cost to continue to provide the service. This meant that submissions were mostly  
11 limited to those willing to pay 25 dollars per specimen or to medical professionals who  
12 removed the ticks from patients. In addition to the cost of tick identification, there was no  
13 available funding for either standardized pathogen screening or database management, which  
14 greatly hampered efforts to provide a more robust dataset. This is in contrast to states such as  
15 Maine, where the state Department of Health was directly involved in collection of tick data  
16 and screening for tick-borne pathogens [8]. In just under 2 decades, the Maine DOH program  
17 (after engaging in a sustained outreach campaign to encourage public submissions) obtained  
18 24,519 ticks were submitted for identification free of charge. We suspect that the submission  
19 numbers for a statewide tick identification program would likewise be high enough to detect  
20 lower abundance ticks and potentially detect invading species.

21

22 *Multi-faceted approach to tick surveillance*

1  
2 Passive surveillance is sometimes criticized for under-representation of certain taxa or bias  
3 toward certain host associations. However, citizen-submitted tick collections can provide  
4 valuable baseline data on prevalence and likelihood of tick encounters ([82–84,7]. In fact, there  
5 is evidence that passive tick surveillance data is more strongly correlated with reported human  
6 cases of tick-borne diseases than active surveillance [7]. A community engagement program  
7 that actively recruits ticks submitted by citizens should be coupled with support for a rigorously  
8 curated database of tick submission.

9  
10 While passive surveillance is able to capture a wide geographic range, active surveillance is able  
11 to detect fine-scale population estimates and host associations. Utilizing complementary  
12 strategies can help fill in knowledge gaps about tick prevalence. For example, in an exclusively  
13 passive surveillance-based study, only 17 of 77 Oklahoma counties were identified as having  
14 established lonestar tick populations (*A. americanum*) [85]. In contrast, in a study using a  
15 combination of retrospective literature review, data compilation of specimens from archival  
16 collections, *and* active collection (dry ice, dragging, and flagging) in counties presumed to be  
17 free of *A. americanum*, 68 of 77 counties of Oklahoma were identified as colonized [83]. One of  
18 the limitations of active collection methods is that while overall population sizes may be high,  
19 sampling may not reflect population abundance, particularly if the distributions are spotty.  
20 Tick populations are not static and may be highly mobile, depending on the host upon which  
21 they alight. Nevertheless, active surveillance can fill in the gaps in tick distribution throughout  
22 each state.

1  
2 Thus, an ideal surveillance program for vector-borne disease epidemiology would utilize both  
3 active and passive collection strategies. Both passive and active collections provide  
4 complementary data for accurate assessment of tick-borne disease risk that can be combined  
5 with reported human cases of tick-borne disease. The metadata associated with both active  
6 and passive tick surveillance (assuming it has been curated and well-managed) can provide  
7 insight into tick-host association, vegetation, seasonality, and shifts in population structure  
8 that can be used for modeling disease risk. Archival tick samples (or their DNA) can be useful  
9 for retrospective mining for research on the population genetics of ticks to detect gene flow,  
10 host shifts, or on their microbial inhabitants.

## 11 12 **Conclusion**

13  
14 When we combine citizen-based passive surveillance data with museum collection data, we  
15 find that hybrid datasets are a powerful tool for mining past ecological and epidemiological  
16 events. Many states maintain county records on passive tick submissions to veterinary or  
17 medical health officials, but there may be other cryptic collections (and associated data)  
18 housed in museums, universities, government institutions, or with private individuals. In the  
19 near future, we are contributing our data to those in the literature and with currently  
20 unexplored collections into a massive meta-analysis. These cryptic ectoparasite collections in  
21 total will provide the basis for exploring hypotheses such as: 1) are shifts in tick populations  
22 correlated with increasing human encroachment on natural habitats, 2) what are some

1 phenological reasons for the increase in *Ixodes scapularis* abundance; or 3) if displacement of a  
2 dominant tick community species occurs, what are the implications for tick-borne disease risk?  
3 We anticipate that participating in such a study will fill in the gaps of knowledge about less  
4 well-studied tick species.

5

6

## 7 **DECLARATIONS**

8 Steve Jacobs is a retired Senior Extension Specialist with the Department of Entomology at  
9 Penn State.

10

## 11 **Acknowledgements**

12 The authors would like to thank Dr. István Mikó for critical manuscript review, the public and  
13 researchers who have contributed ticks to PSU, The Frost Entomological Museum for access to  
14 the collection, and critical suggestions from anonymous reviewers. This work was supported  
15 by funds from NSF GRFP DGE1255832 (to support Damie Pak), the Huck Institutes of Life  
16 Sciences, and the Penn State College of Agriculture.

17

## 18 **Competing interest**

19 The authors declare no conflicts of interest.

20

## 21 **Author Contributions**

22 *SBJ compiled that data into a digital database, collected metadata, identified tick specimens from*



1 1989 until 2017, and manuscript revisions. DP generated data visualizations, conducted statistical  
2 analysis, and contributed to manuscript writing and revisions. JMS curated the database, directed  
3 analyses, and contributed literature review, manuscript writing, and revisions

4

## 5 **References**

- 6 1. Rosenberg R, Lindsey NP, Fischer M, Gregory CJ, Hinckley AF, Mead PS, et al. *Vital Signs*:  
7 Trends in Reported Vectorborne Disease Cases — United States and Territories, 2004–2016.  
8 MMWR Morb Mortal Wkly Rep. 2018;67:496–501.
- 9 2. Sonenshine DE. Range Expansion of Tick Disease Vectors in North America: Implications for  
10 Spread of Tick-Borne Disease. *Int J Environ Res Public Health*. 2018;15.
- 11 3. Eisen RJ, Kugeler KJ, Eisen L, Beard CB, Paddock CD. Tick-Borne Zoonoses in the United  
12 States: Persistent and Emerging Threats to Human Health. *ILAR J*. 2017;58:319–35.
- 13 4. Bouchard C, Leighton PA, Beauchamp G, Nguon S, Trudel L, Milord F, et al. Harvested  
14 white-tailed deer as sentinel hosts for early establishing *Ixodes scapularis* populations and risk  
15 from vector-borne zoonoses in southeastern Canada. *J Med Entomol*. 2013;50:384–93.
- 16 5. Kollars TM, Oliver JH. Host Associations and Seasonal Occurrence of *Haemaphysalis*  
17 *leporispalustris*, *Ixodes brunneus*, *I. cookei*, *I. dentatus*, and *I. texanus* (Acari: Ixodidae) in  
18 Southeastern Missouri. *J Med Entomol*. 2003;40:103–7.

- 1 6. Oliver JD, Bennett SW, Beati L, Bartholomay LC. Range Expansion and Increasing *Borrelia*  
2 *burgdorferi* Infection of the Tick *Ixodes scapularis* (Acari: Ixodidae) in Iowa, 1990-2013. *J Med*  
3 *Entomol.* 2017;54:1727–34.
- 4 7. Ripoche M, Gasmi S, Adam-Poupart A, Koffi JK, Lindsay LR, Ludwig A, et al. Passive Tick  
5 Surveillance Provides an Accurate Early Signal of Emerging Lyme Disease Risk and Human  
6 Cases in Southern Canada. *J Med Entomol.* 2018;
- 7 8. Rand PW, Lacombe EH, Dearborn R, Cahill B, Elias S, Lubelczyk CB, et al. Passive  
8 surveillance in Maine, an area emergent for tick-borne diseases. *J Med Entomol.* 2007;44:1118–  
9 29.
- 10 9. Brownstein JS, Skelly DK, Holford TR, Fish D. Forest fragmentation predicts local scale  
11 heterogeneity of Lyme disease risk. *Oecologia.* 2005;146:469–75.
- 12 10. Simon JA, Marrotte RR, Desrosiers N, Fiset J, Gaitan J, Gonzalez A, et al. Climate change  
13 and habitat fragmentation drive the occurrence of *Borrelia burgdorferi*, the agent of Lyme  
14 disease, at the northeastern limit of its distribution. *Evol Appl.* 2014;7:750–64.
- 15 11. Keirans JE, Litwak TR. Pictorial Key to the Adults of Hard Ticks, Family Ixodidae (Ixodida:  
16 Ixodoidea), East of the Mississippi River. *J Med Entomol.* 1989;26:435–48.
- 17 12. Cooley RA, Kohls GM. The genus *Amblyomma* (Ixodidae) in the United States. *J Parasitol*  
18 [Internet]. 1944;30. Available from: <https://doi.org/10.2307/3272571>

- 1 13. Keirans JE, Clifford CM. The Genus *Ixodes* in the United States: A Scanning Electron  
2 Microscope Study and Key to the Adults. *J Med Entomol.* 1978;15:1–38.
- 3 14. Yunker CE, Keirans JE, Clifford CM, Easton EA. Dermacentor ticks (Acari: Ixodoidea:  
4 Ixodidae) of the New World: a scanning electron microscope atlas. *Proc Entomol Soc Wash.*  
5 1986;88:609–27.
- 6 15. Durden LA, Keirans JE. Description of the larva, diagnosis of the nymph and female based  
7 on scanning electron microscopy, hosts, and distribution of *Ixodes (Ixodes) venezuelensis*. *Med*  
8 *Vet Entomol.* 1994;8:310–6.
- 9 16. Durden LA, Keirans JE. Nymphs of the genus *Ixodes* of the United States. Lanham,  
10 Maryland, USA: Entomological Society of America; 1996.
- 11 17. Keirans JE, Durden LA. Illustrated Key to Nymphs of the Tick Genus *Amblyomma* (Acari:  
12 Ixodidae) Found in the United States. *J Med Entomol.* 1998;35:489–95.
- 13 18. Gu Z, Gu L, Eils R, Schlesner M, Brors B. circlize Implements and enhances circular  
14 visualization in R. *Bioinforma Oxf Engl.* 2014;30:2811–2.
- 15 19. McLeod AI. MannKendall. 2011.
- 16 20. Anderson JF, Duray PH, Magnarelli LA. *Borrelia burgdorferi* and *Ixodes dammini* prevalent  
17 in the greater Philadelphia area. *J Infect Dis.* 1990;161:811–2.

- 1 21. Baer-Lehman ML, Light T, Fuller NW, Barry-Landis KD, Kindlin CM, Stewart RL. Evidence  
2 for competition between *Ixodes scapularis* and *Dermacentor albipictus* feeding concurrently  
3 on white-tailed deer. *Exp Appl Acarol*. 2012;58:301–14.
- 4 22. Brown SM, Lehman PM, Kern RA, Henning JD. Detection of *Borrelia burgdorferi* and  
5 *Anaplasma phagocytophilum* in the black-legged tick, *Ixodes scapularis*, within southwestern  
6 Pennsylvania. *J Vector Ecol J Soc Vector Ecol*. 2015;40:180–3.
- 7 23. Campagnolo ER, Tewari D, Farone TS, Livengood JL, Mason KL. Evidence of  
8 Powassan/deer tick virus in adult black-legged ticks (*Ixodes scapularis*) recovered from hunter-  
9 harvested white-tailed deer (*Odocoileus virginianus*) in Pennsylvania: A public health  
10 perspective. *Zoonoses Public Health*. 2018;65:589–94.
- 11 24. Courtney JW, Dryden RL, Montgomery J, Schneider BS, Smith G, Massung RF. Molecular  
12 characterization of *Anaplasma phagocytophilum* and *Borrelia burgdorferi* in *Ixodes scapularis*  
13 ticks from Pennsylvania. *J Clin Microbiol*. 2003;41:1569–73.
- 14 25. Crowder CD, Carolan HE, Rounds MA, Honig V, Mothes B, Haag H, et al. Prevalence of  
15 *Borrelia miyamotoi* in *Ixodes* ticks in Europe and the United States. *Emerg Infect Dis*.  
16 2014;20:1678–82.
- 17 26. Daniels TJ, Fish D, Levine JF, Greco MA, Eaton AT, Padgett PJ, et al. Canine exposure to  
18 *Borrelia burgdorferi* and prevalence of *Ixodes dammini* (Acari: Ixodidae) on deer as a measure  
19 of Lyme disease risk in the northeastern United States. *J Med Entomol*. 1993;30:171–8.

- 1 27. Devevey G, Brisson D. The effect of spatial heterogeneity on the aggregation of ticks on  
2 white-footed mice. *Parasitology*. 2012;139:915–25.
- 3 28. Dick CW, Gannon MR, Little WE, Patrick MJ. Ectoparasite associations of bats from central  
4 Pennsylvania. *J Med Entomol*. 2003;40:813–9.
- 5 29. Edwards MJ, Barbalato LA, Makkapati A, Pham KD, Bugbee LM. Relatively low prevalence  
6 of *Babesia microti* and *Anaplasma phagocytophilum* in *Ixodes scapularis* ticks collected in the  
7 Lehigh Valley region of eastern Pennsylvania. *Ticks Tick-Borne Dis*. 2015;6:812–9.
- 8 30. Han GS, Stromdahl EY, Wong D, Weltman AC. Exposure to *Borrelia burgdorferi* and other  
9 tick-borne pathogens in Gettysburg National Military Park, South-Central Pennsylvania, 2009.  
10 *Vector Borne Zoonotic Dis* Larchmt N. 2014;14:227–33.
- 11 31. Hutchinson ML, Strohecker MD, Simmons TW, Kyle AD, Helwig MW. Prevalence Rates of  
12 *Borrelia burgdorferi* (Spirochaetales: Spirochaetaceae), *Anaplasma phagocytophilum*  
13 (Rickettsiales: Anaplasmataceae), and *Babesia microti* (Piroplasmida: Babesiidae) in Host-  
14 Seeking *Ixodes scapularis* (Acari: Ixodidae) from Pennsylvania. *J Med Entomol*. 2015;52:693–8.
- 15 32. Lo Re V, Occi JL, MacGregor RR. Identifying the vector of Lyme disease. *Am Fam Physician*.  
16 2004;69:1935–7.
- 17 33. Lord RD, Lord VR, Humphreys JG, McLean RG. Distribution of *Borrelia burgdorferi* in host  
18 mice in Pennsylvania. *J Clin Microbiol*. 1994;32:2501–4.

- 1 34. Magnarelli LA, Stafford KC, Mather TN, Yeh MT, Horn KD, Dumler JS. Hemocytic  
2 rickettsia-like organisms in ticks: serologic reactivity with antisera to Ehrlichiae and detection  
3 of DNA of agent of human granulocytic ehrlichiosis by PCR. *J Clin Microbiol.* 1995;33:2710–4.
- 4 35. Miller MJ, Esser HJ, Loaiza JR, Herre EA, Aguilar C, Quintero D, et al. Molecular Ecological  
5 Insights into Neotropical Bird-Tick Interactions. *PloS One.* 2016;11:e0155989.
- 6 36. Rogers MB, Cui L, Fitch A, Popov V, Travassos da Rosa APA, Vasilakis N, et al. Whole  
7 genome analysis of sierra nevada virus, a novel mononegavirus in the family nyamiviridae. *Am*  
8 *J Trop Med Hyg.* 2014;91:159–64.
- 9 37. Sakamoto JM, Ng TFF, Suzuki Y, Tsujimoto H, Deng X, Delwart E, et al. Bunyaviruses are  
10 common in male and female Ixodes scapularis ticks in central Pennsylvania. *PeerJ.*  
11 2016;4:e2324.
- 12 38. Sakamoto JM, Goddard J, Rasgon JL. Population and demographic structure of Ixodes  
13 scapularis Say in the eastern United States. *PloS One.* 2014;9:e101389.
- 14 39. Schoelkopf L, Hutchinson CE, Bendele KG, Goff WL, Willette M, Rasmussen JM, et al. New  
15 ruminant hosts and wider geographic range identified for Babesia odocoilei (Emerson and  
16 Wright 1970). *J Wildl Dis.* 2005;41:683–90.
- 17 40. Serfass TL, Rymon LM, Brooks RP. Ectoparasites from river otters in Pennsylvania. *J Wildl*  
18 *Dis.* 1992;28:138–40.

- 1 41. Shock BC, Moncayo A, Cohen S, Mitchell EA, Williamson PC, Lopez G, et al. Diversity of  
2 piroplasms detected in blood-fed and questing ticks from several states in the United States.  
3 Ticks Tick-Borne Dis. 2014;5:373–80.
- 4 42. Simmons TW, Shea J, Myers-Claypole MA, Kruse R, Hutchinson ML. Seasonal Activity,  
5 Density, and Collection Efficiency of the Blacklegged Tick (*Ixodes scapularis*) (Acari: Ixodidae)  
6 in Mid-Western Pennsylvania. J Med Entomol. 2015;52:1260–9.
- 7 43. Snetsinger R, Jacobs SB, Kim KC, Tavis D. Extension of the range of *Dermacentor variabilis*  
8 (Acari: Ixodidae) in Pennsylvania. J Med Entomol. 1993;30:795–8.
- 9 44. Springer YP, Jarnevich CS, Barnett DT, Monaghan AJ, Eisen RJ. Modeling the Present and  
10 Future Geographic Distribution of the Lone Star Tick, *Amblyomma americanum* (Ixodida:  
11 Ixodidae), in the Continental United States. Am J Trop Med Hyg. 2015;93:875–90.
- 12 45. Steiner FE, Pinger RR, Vann CN, Grindle N, Civitello D, Clay K, et al. Infection and co-  
13 infection rates of *Anaplasma phagocytophilum* variants, *Babesia* spp., *Borrelia burgdorferi*,  
14 and the rickettsial endosymbiont in *Ixodes scapularis* (Acari: Ixodidae) from sites in Indiana,  
15 Maine, Pennsylvania, and Wisconsin. J Med Entomol. 2008;45:289–97.
- 16 46. Stromdahl E, Hamer S, Jenkins S, Sloan L, Williamson P, Foster E, et al. Comparison of  
17 phenology and pathogen prevalence, including infection with the Ehrlichia muris-like (EML)  
18 agent, of *Ixodes scapularis* removed from soldiers in the midwestern and the northeastern  
19 United States over a 15 year period (1997-2012). Parasit Vectors. 2014;7:553.

- 1 47. Waits K, Edwards MJ, Cobb IN, Fontenele RS, Varsani A. Identification of an anellovirus and  
2 genomoviruses in ixodid ticks. *Virus Genes*. 2018;54:155–9.
- 3 48. Yeh MT, Bak JM, Hu R, Nicholson MC, Kelly C, Mather TN. Determining the duration of  
4 *Ixodes scapularis* (Acari: Ixodidae) attachment to tick-bite victims. *J Med Entomol*.  
5 1995;32:853–8.
- 6 49. Snetsinger RJ. *Distribution of Ticks and Tick-Borne Diseases in Pennsylvania*. University  
7 Park, PA: Pennsylvania State University, College of Agriculture, Agricultural Experiment  
8 Station,; 1968.
- 9 50. Chen X, Xu S, Yu Z, Guo L, Yang S, Liu L, et al. Multiple lines of evidence on the genetic  
10 relatedness of the parthenogenetic and bisexual *Haemaphysalis longicornis* (Acari: Ixodidae).  
11 *Infect Genet Evol J Mol Epidemiol Evol Genet Infect Dis*. 2014;21:308–14.
- 12 51. Chinuki Y, Ishiwata K, Yamaji K, Takahashi H, Morita E. *Haemaphysalis longicornis* tick  
13 bites are a possible cause of red meat allergy in Japan. *Allergy*. 2016;71:421–5.
- 14 52. Rainey T, Occi JL, Robbins RG, Egizi A. Discovery of *Haemaphysalis longicornis* (Ixodida:  
15 Ixodidae) Parasitizing a Sheep in New Jersey, United States. *J Med Entomol*. 2018;55:757–9.
- 16 53. Bishopp FC, Trembley HL. *Distribution and Hosts of Certain North American Ticks*. *J*  
17 *Parasitol*. 1945;31:1–54.
- 18 54. Pretzman C, Daugherty N, Poetter K, Ralph D. The distribution and dynamics of *Rickettsia*  
19 in the tick population of Ohio. *Ann N Y Acad Sci*. 1990;590:227–36.



- 1 55. Wang P, Glowacki MN, Hoet AE, Needham GR, Smith KA, Gary RE, et al. Emergence of  
2 *Ixodes scapularis* and *Borrelia burgdorferi*, the Lyme disease vector and agent, in Ohio. *Front*  
3 *Cell Infect Microbiol* [Internet]. 2014 [cited 2017 Nov 19];4. Available from:  
4 <https://www.frontiersin.org/articles/10.3389/fcimb.2014.00070/full#h4>
- 5 56. Brites-Neto J, Duarte KMR, Martins TF. Tick-borne infections in human and animal  
6 population worldwide. *Vet World*. 2015;8:301–15.
- 7 57. ProMED-mail. Rocky mountain spotted fever - USA (03): (PA) fatal [Internet]. 2014 Sep.  
8 Available from: <https://www.promedmail.org/post/2757657>
- 9 58. Levin ML, Zemtsova GE, Killmaster LF, Snellgrove A, Schumacher LBM. Vector  
10 competence of *Amblyomma americanum* (Acari: Ixodidae) for *Rickettsia rickettsii*. *Ticks Tick-*  
11 *Borne Dis*. 2017;8:615–22.
- 12 59. Savage HM, Godsey MS, Panella NA, Burkhalter KL, Manford J, Trevino-Garrison IC, et al.  
13 Surveillance for Tick-Borne Viruses Near the Location of a Fatal Human Case of Bourbon Virus  
14 (Family Orthomyxoviridae: Genus Thogotovirus) in Eastern Kansas, 2015. *J Med Entomol*.  
15 2018;
- 16 60. Commins SP, Platts-Mills TAE. Tick bites and red meat allergy. *Curr Opin Allergy Clin*  
17 *Immunol*. 2013;13:354–9.
- 18 61. Guglielmone AA, Robbins RG, Apanaskevich DA, Petney TN, Estrada-Peña A, Horak IG.  
19 *The Hard Ticks of the World* [Internet]. Dordrecht: Springer Netherlands; 2014 [cited 2018 Mar  
20 14]. Available from: <http://link.springer.com/10.1007/978-94-007-7497-1>

- 1 62. Parker RR, Pickens EG, Lackman DB, Bell EJ, Thraikill FB. Isolation and Characterization of  
2 Rocky Mountain Spotted Fever Rickettsiae from the Rabbit Tick *Haemaphysalis leporis-*  
3 *palustris* Packard. *Public Health Rep* 1896-1970. 1951;66:455–63.
- 4 63. Gabriele-Rivet V, Arsenault J, Badcock J, Cheng A, Edsall J, Goltz J, et al. Different  
5 Ecological Niches for Ticks of Public Health Significance in Canada. *PLOS ONE*.  
6 2015;10:e0131282.
- 7 64. Schneider SC, Parker CM, Miller JR, Page Fredericks L, Allan BF. Assessing the Contribution  
8 of Songbirds to the Movement of Ticks and *Borrelia burgdorferi* in the Midwestern United  
9 States During Fall Migration. *EcoHealth*. 2015;12:164–73.
- 10 65. Burg JG. Seasonal activity and spatial distribution of host-seeking adults of the tick  
11 *Dermacentor variabilis*. *Med Vet Entomol*. 2001;15:413–21.
- 12 66. Kollars TM, Oliver JH, Durden LA, Kollars PG. Host Associations and Seasonal Activity of  
13 *Amblyomma americanum* (Acari: Ixodidae) in Missouri. *J Parasitol*. 2000;86:1156–9.
- 14 67. Ko RC. Biology of *Ixodes cookei* Packard (Ixodidae) of groundhogs (*Marmota monax*  
15 *Erxleben*). *Can J Zool*. 1972;50:433–6.
- 16 68. McLean DM, Best JM, MAHALINGAM S, Chernesky MA, Wilson WE. Powassan Virus:  
17 Summer Infection Cycle, 1964. 1965.
- 18 69. Ryder JW, Pinger RR, Glancy T. Inability of *Ixodes cookei* and *Amblyomma americanum*  
19 nymphs (Acari: Ixodidae) to transmit *Borrelia burgdorferi*. *J Med Entomol*. 1992;29:525–30.

- 1 70. Brillhart DB, Fox LB, Upton SJ. Ticks (Acari: Ixodidae) collected from small and medium-  
2 sized Kansas mammals. *J Med Entomol.* 1994;31:500–4.
- 3 71. Cohen SB, Freye JD, Dunlap BG, Dunn JR, Jones TF, Moncayo AC. Host associations of  
4 Dermacentor, Amblyomma, and Ixodes (Acari: Ixodidae) ticks in Tennessee. *J Med Entomol.*  
5 2010;47:415–20.
- 6 72. Merten HA, Durden LA. A state-by-state survey of ticks recorded from humans in the  
7 United States. *J Vector Ecol J Soc Vector Ecol.* 2000;25:102–13.
- 8 73. Barker IK, Lindsay LR, Campbell GD, Surgeoner GA, McEwen SA. The groundhog tick  
9 Ixodes cookei (Acari: Ixodidae): a poor potential vector of Lyme borreliosis. *J Wildl Dis.*  
10 1993;29:416–22.
- 11 74. Wright CL, Sonenshine DE, Gaff HD, Hynes WL. Rickettsia parkeri Transmission to  
12 Amblyomma americanum by Cofeeding with Amblyomma maculatum (Acari: Ixodidae) and  
13 Potential for Spillover. *J Med Entomol.* 2015;52:1090–5.
- 14 75. Main AJ, Carey AB, Downs WG. POWASSAN VIRUS IN Ixodes cookei AND MUSTELIDAE IN  
15 NEW ENGLAND. *J Wildl Dis.* 1979;15:585–91.
- 16 76. Eisen RJ, Eisen L, Beard CB. County-Scale Distribution of Ixodes scapularis and Ixodes  
17 pacificus (Acari: Ixodidae) in the Continental United States. *J Med Entomol.* 2016;53:349–86.
- 18 77. Krawczak FS, Nieri-Bastos FA, Nunes FP, Soares JF, Moraes-Filho J, Labruna MB. Rickettsial  
19 infection in Amblyomma cajennense ticks and capybaras (Hydrochoerus hydrochaeris) in a

- 1 Brazilian spotted fever-endemic area. *Parasit Vectors* [Internet]. 2014;7. Available from:
- 2 <https://doi.org/10.1186/1756-3305-7-7>
- 3 78. Kohls GM, Hoogstraal H, Clifford CM, Kaiser MN. The Subgenus *Persicargas* (Ixodoidea,
- 4 *Argasidae*, *Argas*). 9. Redescription and New World Records of *Argas* (*P.*) *persicus* (Oken), and
- 5 Resurrection, Redescription, and Records of *A.* (*P.*) *radiatus* Railliet, *A.* (*P.*) *sanchezi* Duges, and
- 6 *A.* (*P.*) *miniatus* Koch, New World Ticks Misidentified as *A.* (*P.*) *persicus*. *Ann Entomol Soc Am.*
- 7 1970;63:590–606.
- 8 79. Keirans JE, Durden LA. Invasion: Exotic Ticks (Acari: Argasidae, Ixodidae) Imported into the
- 9 United States. A Review and New Records. *J Med Entomol.* 2001;38:850–61.
- 10 80. Muñoz-Leal S, Venzal JM, Nava S, Reyes M, Martins TF, Leite RC, et al. The geographic
- 11 distribution of *Argas* (*Persicargas*) *miniatus* and *Argas* (*Persicargas*) *persicus* (Acari: Argasidae)
- 12 in America, with morphological and molecular diagnoses from Brazil, Chile and Cuba. *Ticks*
- 13 *Tick-Borne Dis.* 2018;9:44–56.
- 14 81. Kohls GM, Hoogstraal H. Observations on the Subgenus *Argas* (Ixodoidea, Argasidae,
- 15 *Argas*) 2. *A. Cooleyi*, New Species, from Western North American Birds<sup>1</sup>. *Ann Entomol Soc*
- 16 *Am.* 1960;53:625–31.
- 17 82. Cortinas R, Spomer SM. Occurrence and County-Level Distribution of Ticks (Acari:
- 18 Ixodoidea) in Nebraska using Passive Surveillance. *J Med Entomol.* 2014;51:352–9.

- 1 83. Barrett AW, Noden BH, Gruntmeir JM, Holland T, Mitcham JR, Martin JE, et al. County  
2 Scale Distribution of *Amblyomma americanum* (Ixodida: Ixodidae) in Oklahoma: Addressing  
3 Local Deficits in Tick Maps Based on Passive Reporting. *J Med Entomol.* 2015;52:269–73.
- 4 84. Xu G, Mather TN, Hollingsworth CS, Rich SM. Passive Surveillance of *Ixodes scapularis*  
5 (Say), Their Biting Activity, and Associated Pathogens in Massachusetts. *Vector Borne*  
6 *Zoonotic Dis.* 2016;16:520–7.
- 7 85. Springer YP, Eisen L, Beati L, James AM, Eisen RJ. Spatial Distribution of Counties in the  
8 Continental United States With Records of Occurrence of *Amblyomma americanum* (Ixodida:  
9 Ixodidae). *J Med Entomol.* 2014;51:342–51.

10

11

## 1 **Figures**

2 **Figure 1:** Annual reported cases of Lyme disease by state from 2006--2017 (Left) and the  
3 annual reported cases of Lyme diseases by counties in Pennsylvania from 2006--2017. Public  
4 data from the Center of Infectious Disease.

5

6 **Figure 2:** Total population in Pennsylvania counties in 1960, 1990, 2000, and 2010.

7

8 **Figure 3: Dot-density map of all individual tick specimens across Pennsylvania from 1900–**  
9 **2017.** Each point represents an individual specimen with its placement randomized within the  
10 county.

11

12 **Figure 4: Incidence rates of** the five most abundant tick species across Pennsylvania at  
13 different time periods from 1960–2018 . On the left, is cumulative number of individuals.

14

15 **Figure 5.** Presence or absence map of the tick genera excluding *Ixodes scapularis*, *Ixodes cookei*,  
16 *Dermacentor variabilis*, *Amblyomma americanum*, and *Rhipicephalus sanguineus*.

17

18 **Figure 6:** On the left is the annual sum of tick specimens (log-transformed) from 1900 to 2017.  
19 On the right are the proportional contribution of the major tick species to the total tick counts  
20 (1900–2017). The grey shaded area represent area where there was no tick submissions.

21

1 **Figure 7:** On the left is the total proportion of tick specimens received at different months of  
2 the years from 1900 to 2017. On the right are the proportion of the five major tick species  
3 received at different months of the years from 1900–2017.

4

5 **Figure 8:** The monthly proportion of the tick specimens received at different months of the  
6 years aggregated at different decades.

7

8 **Figure 9:** The monthly proportion of *D. variabilis* specimens at the larvae, nymphal, and adult  
9 stages across 1960 to 2010

10

11 **Figure 10:** The monthly proportion of *I. scapularis* specimens at the larvae, nymphal, and adult  
12 stages across 1990 to 2017

13

14 **Figure 11:** The monthly proportion of *I. cookei* specimens at the larval, nymphal, and adult  
15 stages across 1980 to 2017

16

17 **Figure 12:** Visual representation of the quantitative data on ticks associated with different  
18 hosts.

19

20 **Figure S1:** The monthly proportion of *A. americanum* specimens at the larvae, nymphal, and  
21 adult stages across 1990 to 2017

22

1 **Figure S2:** The monthly proportion of *R. sanguineus* specimens at the larvae, nymphal, and  
2 adult stages across 1990 to 2017

3

4 **Table 1:** The total submissions to the PSU Department of Entomology/Frost Entomological  
5 Museum from 1900 to 2017. Generic names that have been changed since the submission date  
6 are shown in parentheses. Specimens which were not identified to species were listed under  
7 the genus and "sp."

8

9 **Supplementary Table S1:** Specimens submitted from outside of the state of Pennsylvania.

10



## Pennsylvania counties

## United States

2000 2001 2002 2003 2004 2005 2006 2007 2008 2009 2010 2011 2012 2013 2014 2015 2016

2000 2001 2002 2003 2004 2005 2006 2007 2008 2009 2010 2011 2012 2013 2014 2015 2016

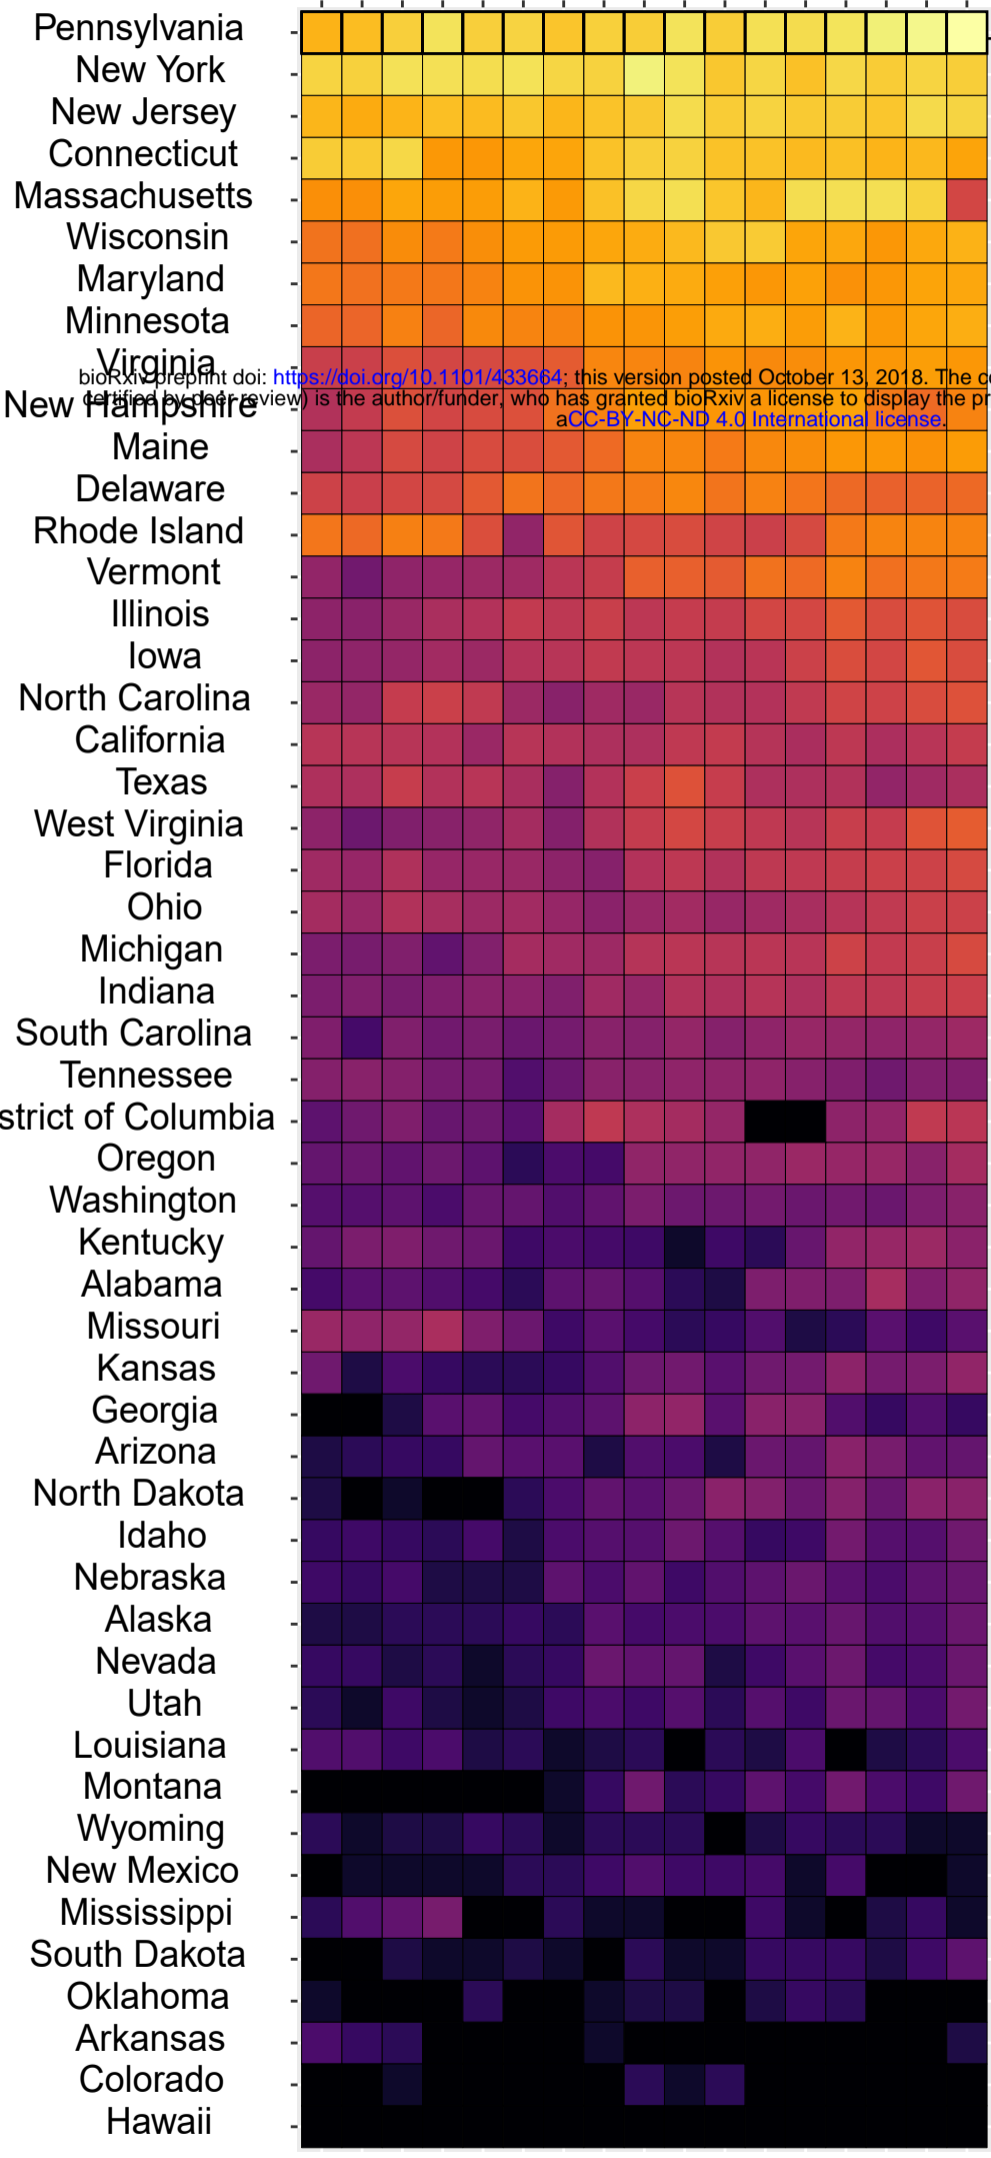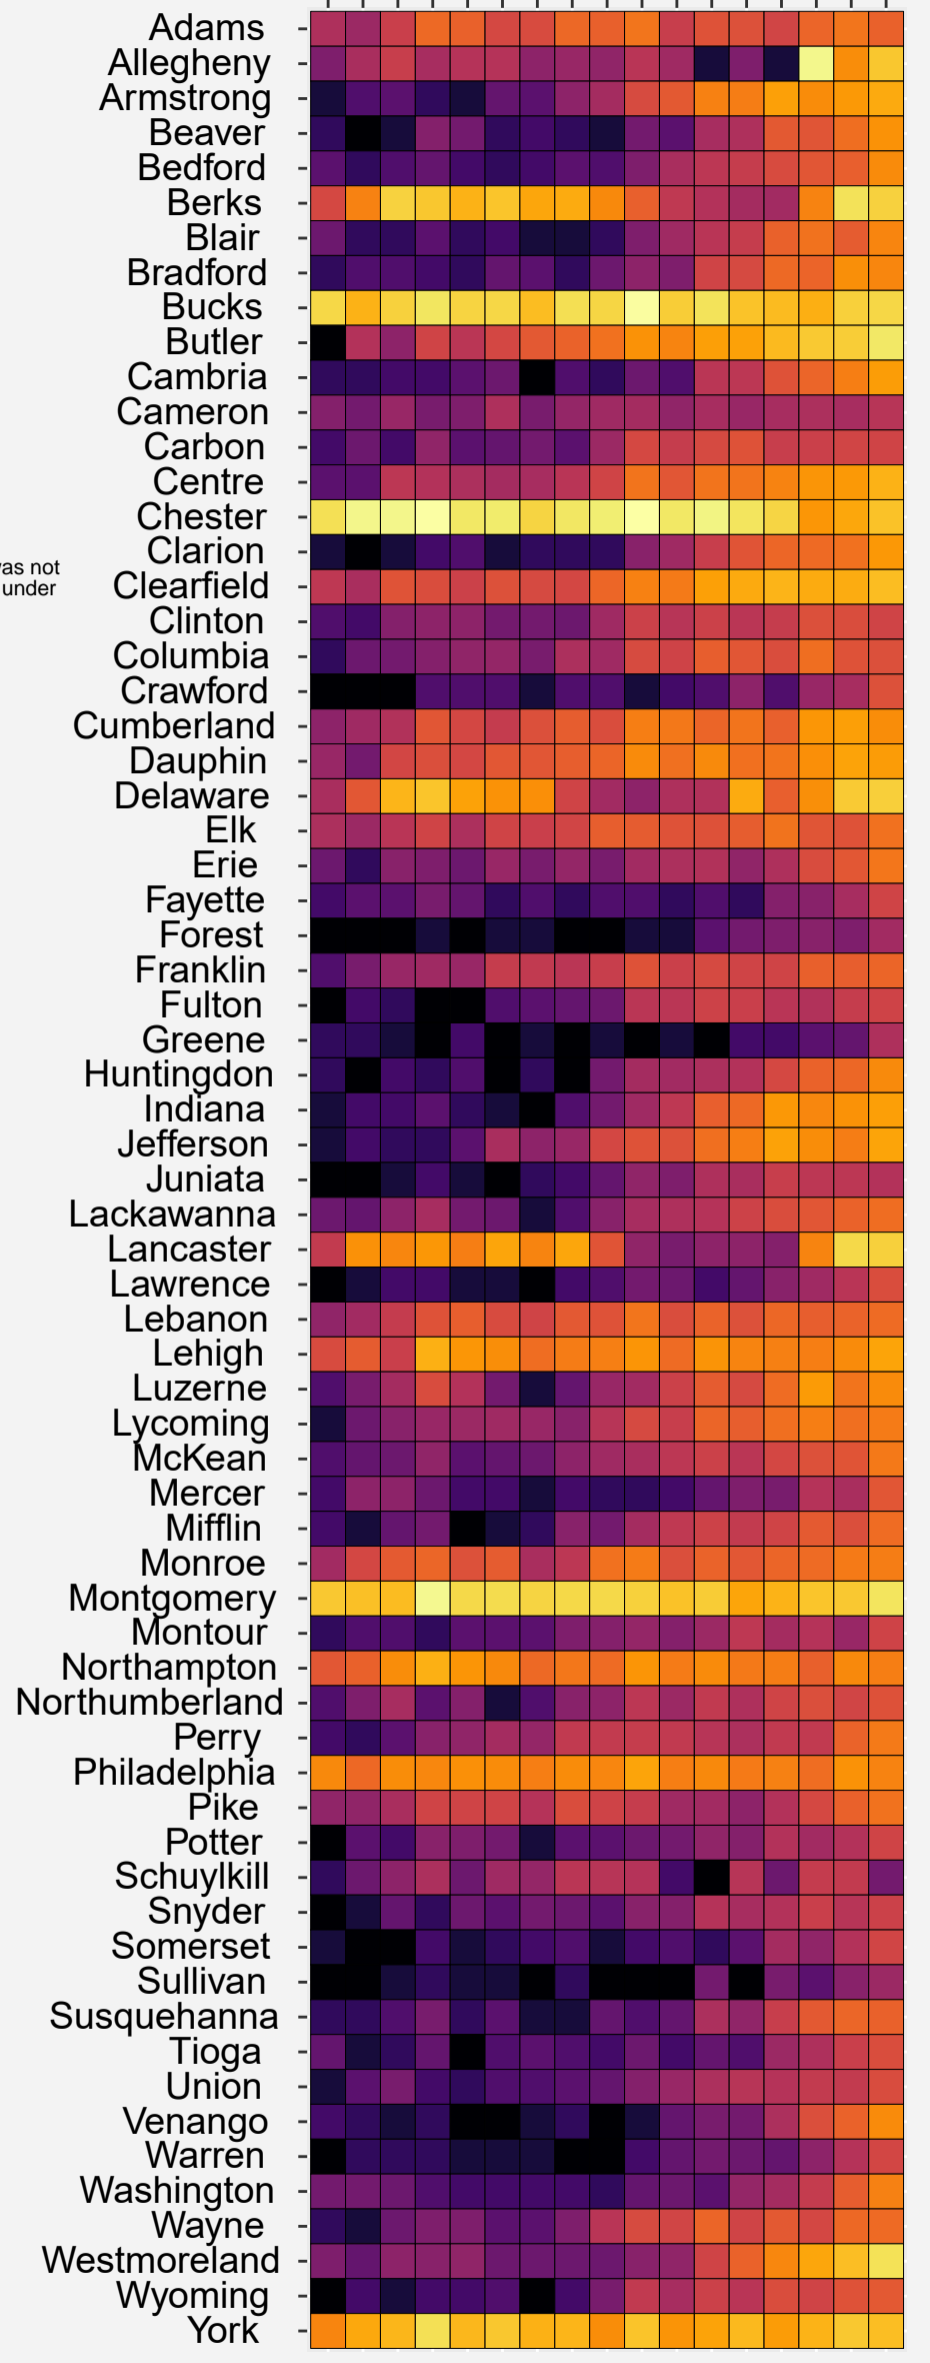

bioRxiv preprint doi: <https://doi.org/10.1101/433664>; this version posted October 13, 2018. The copyright holder for this preprint (which was not certified by peer review) is the author/funder, who has granted bioRxiv a license to display the preprint in perpetuity. It is made available under aCC-BY-NC-ND 4.0 International license.

Total Cases (Log-transformed)

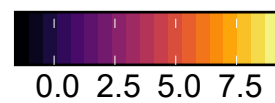

1960

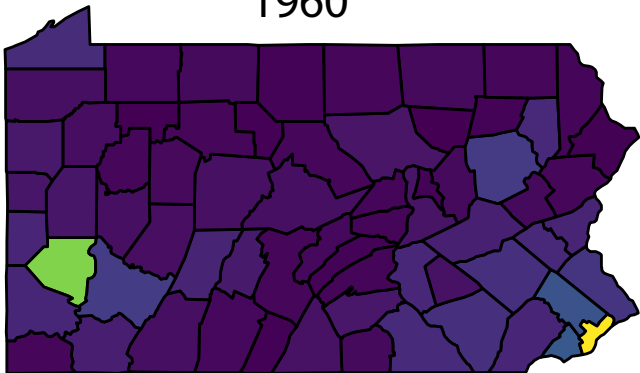

1990

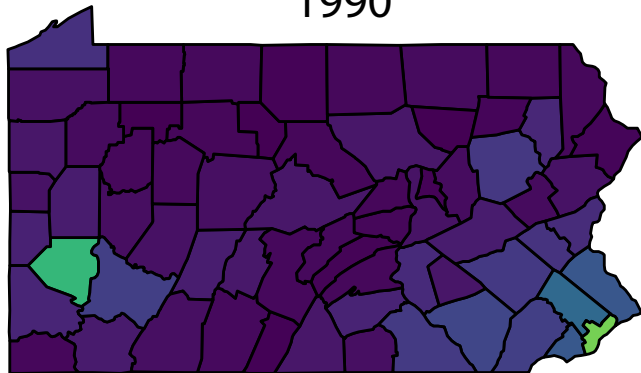

2000

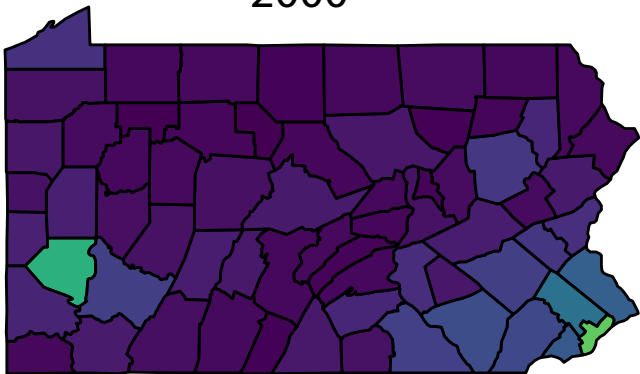

2010

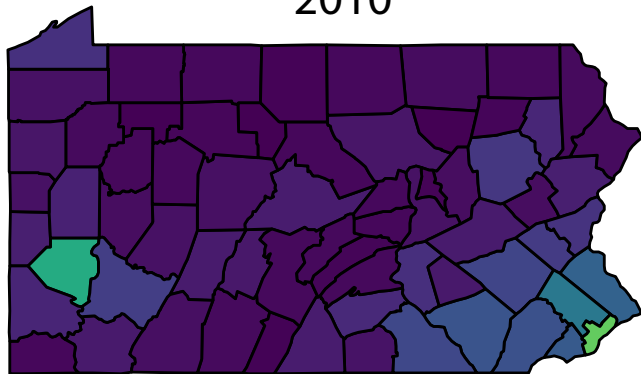

Population

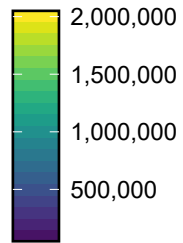



# Tick submissions across Pennsylvania (1900–2017)

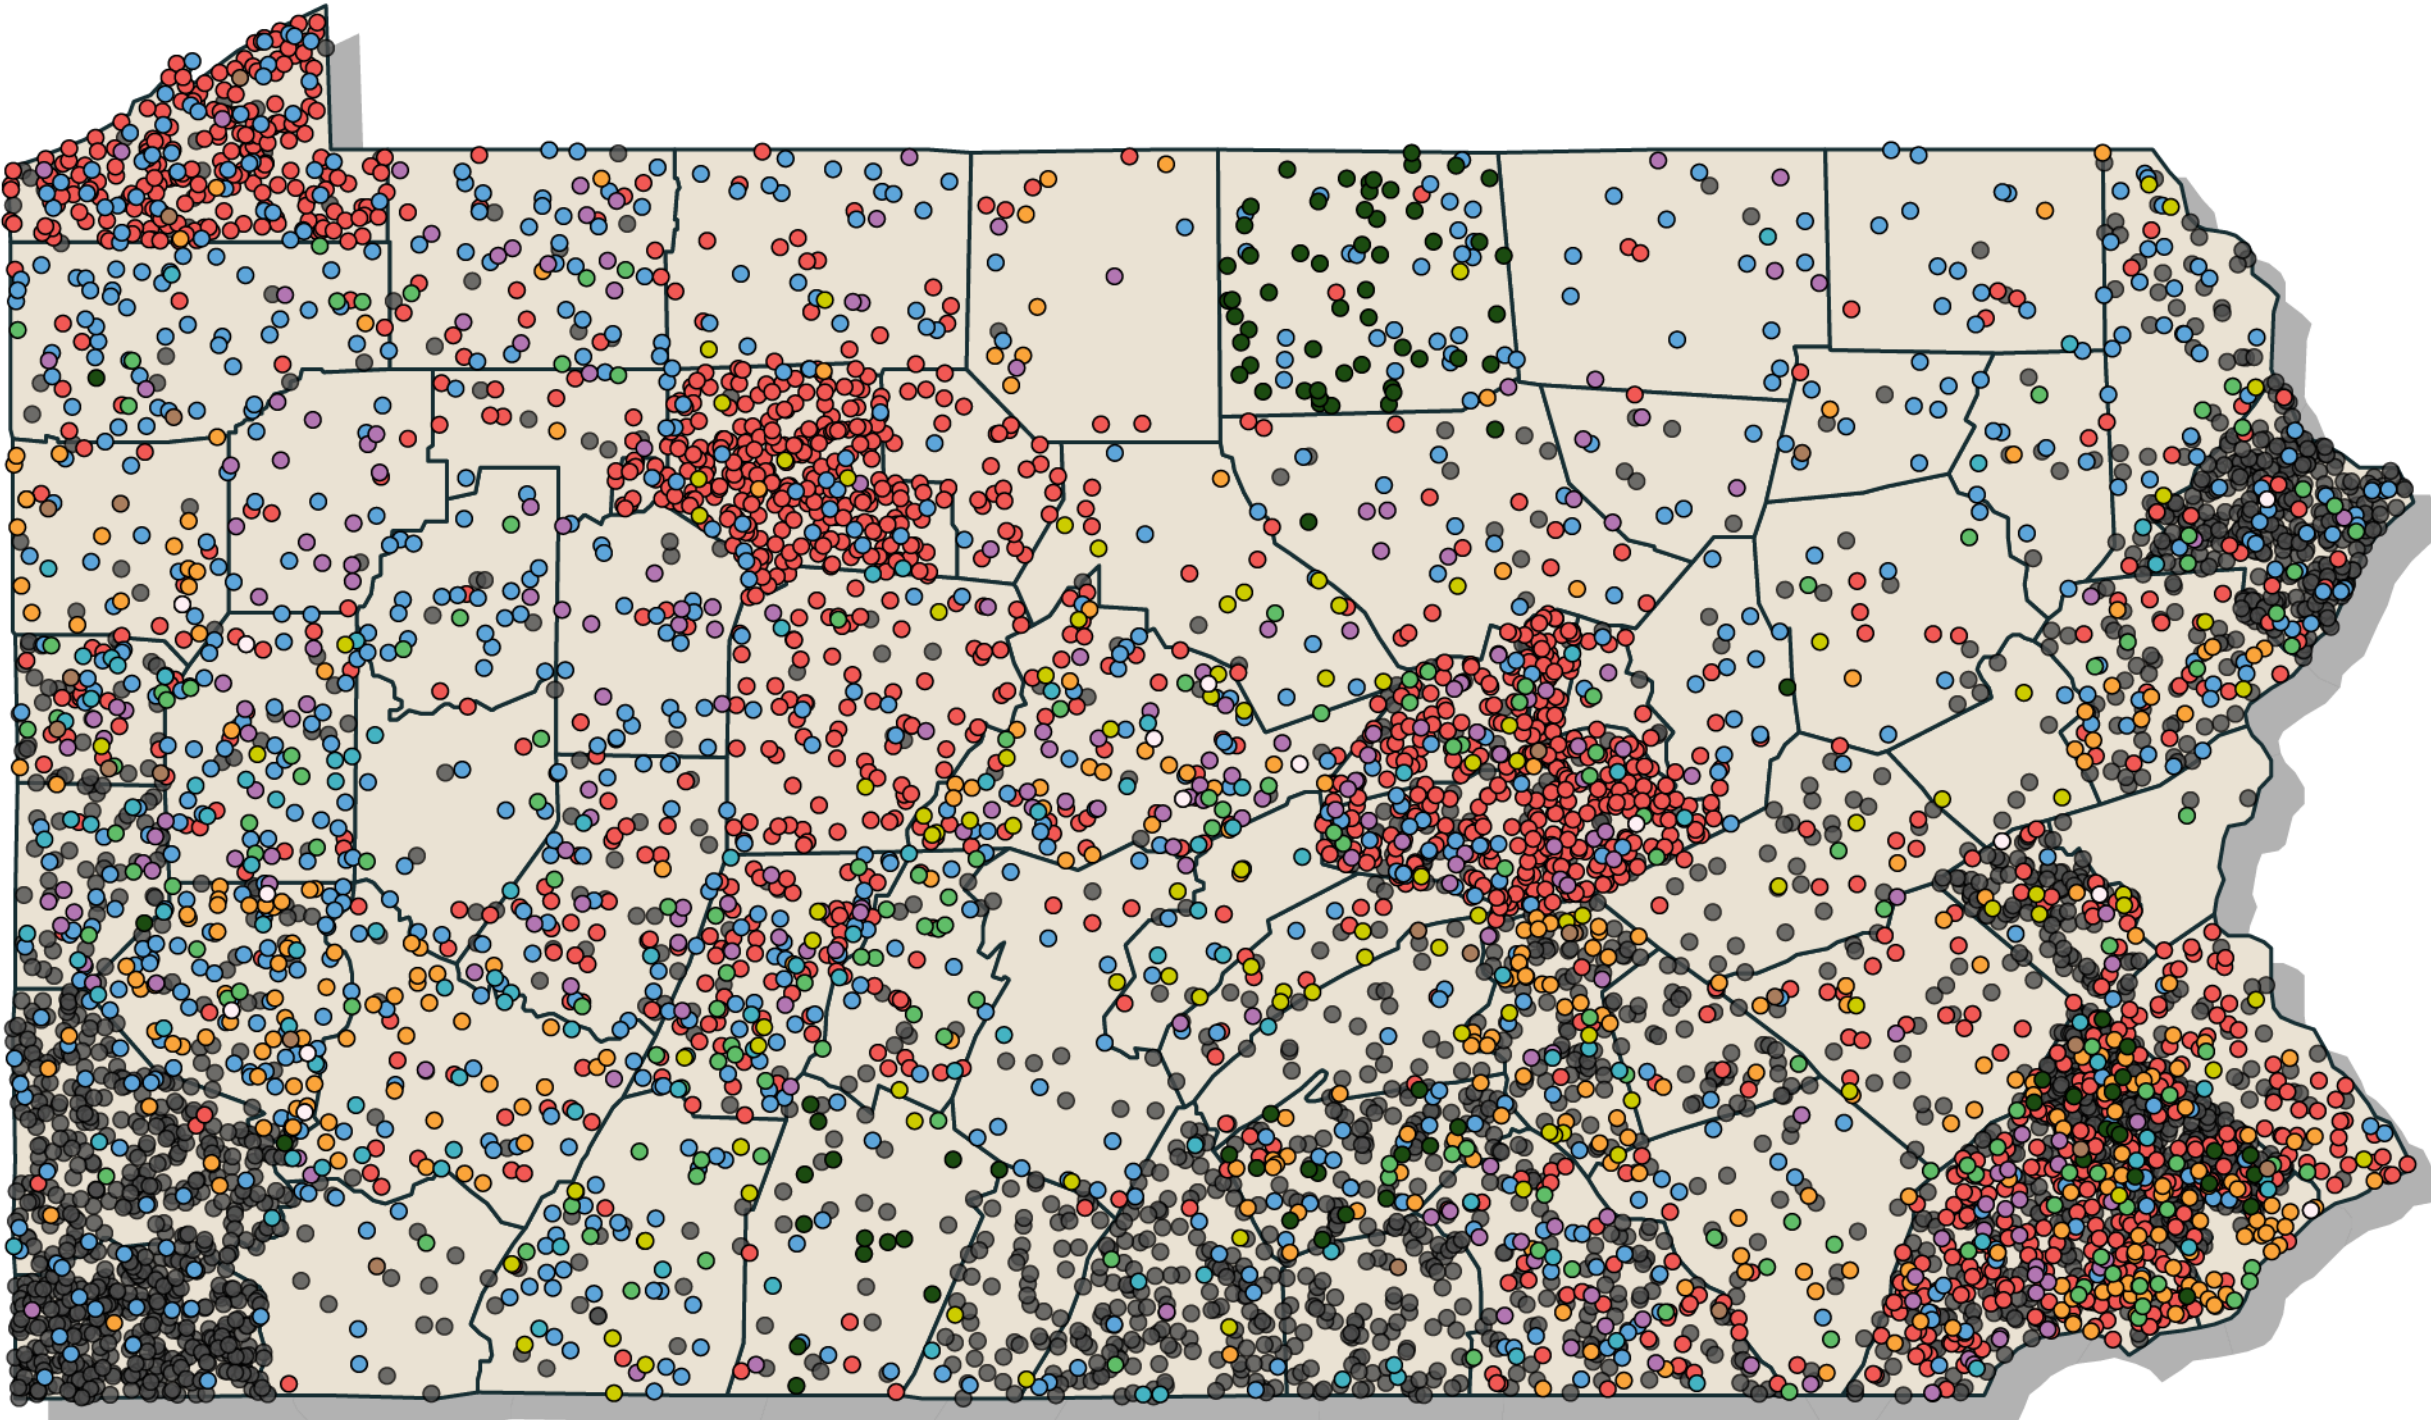

## Species

- |                                                            |                                                         |                                                                  |                                                              |
|------------------------------------------------------------|---------------------------------------------------------|------------------------------------------------------------------|--------------------------------------------------------------|
| <span style="color: green;">●</span> <i>A. americanum</i>  | <span style="color: blue;">●</span> <i>I. cookei</i>    | <span style="color: darkgreen;">●</span> <i>I. texanus</i>       | <span style="color: purple;">●</span> Other Ixodidae species |
| <span style="color: yellow;">●</span> <i>D. albipictus</i> | <span style="color: cyan;">●</span> <i>I. dentatus</i>  | <span style="color: lightblue;">●</span> Other Amblyomma species | <span style="color: orange;">●</span> <i>R. sanguineus</i>   |
| <span style="color: grey;">●</span> <i>D. variabilis</i>   | <span style="color: red;">●</span> <i>I. scapularis</i> | <span style="color: white;">○</span> Other Dermacentor species   | <span style="color: brown;">●</span> Soft ticks              |



# Incidence rates

1960-1970

1990-2000

2000-2010

2010-2020

Cumulative

*A. americanum*

bioRxiv preprint doi: <https://doi.org/10.1101/433664>; this version posted October 13, 2018. The copyright holder for this preprint (which was not certified by peer review) is the author/funder, who has granted bioRxiv a license to display the preprint in perpetuity. It is made available under aCC-BY-NC-ND 4.0 International license.

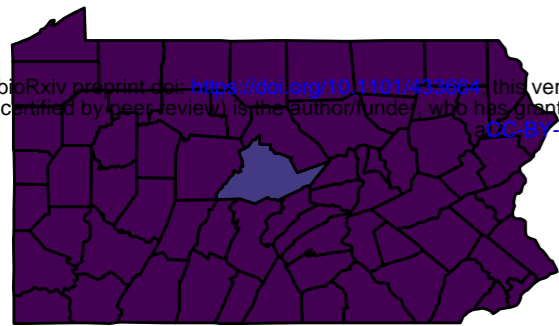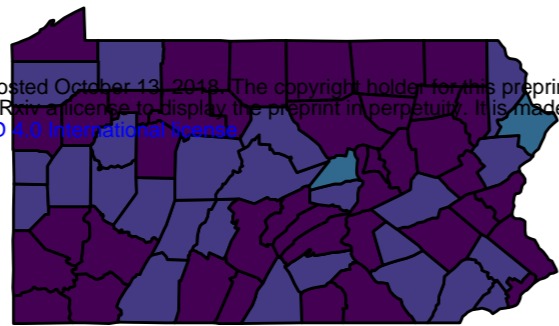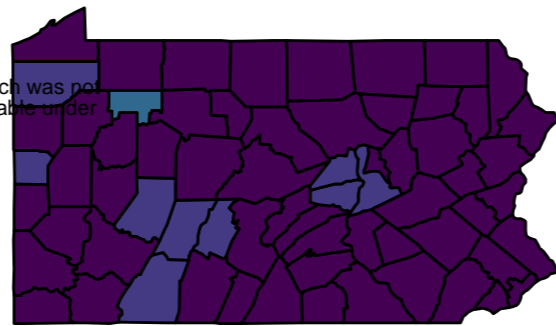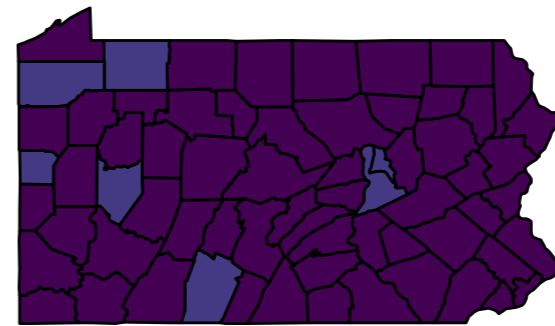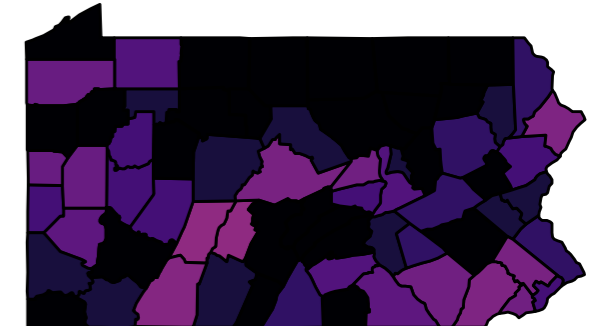

*I. cookei*

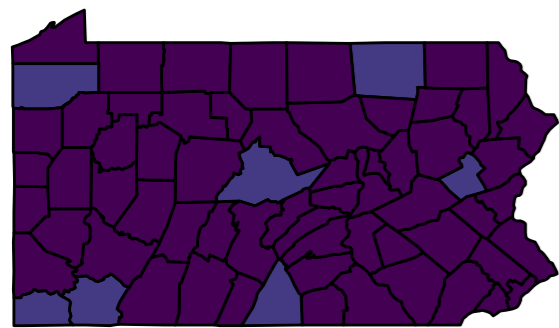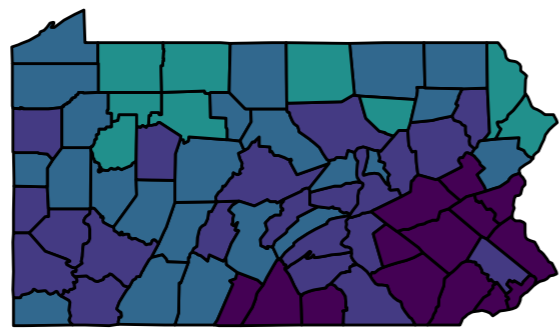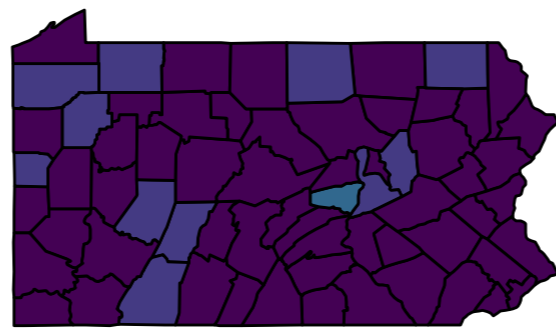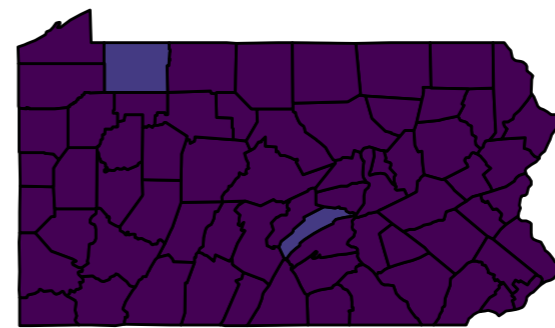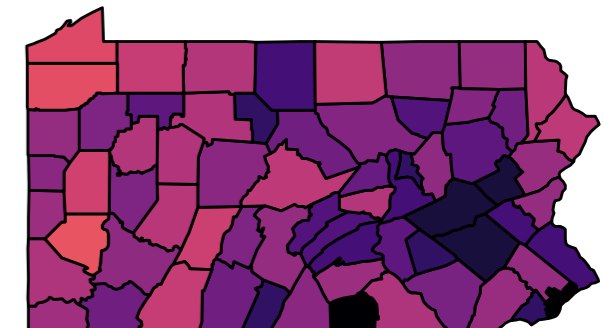

*R. sanguineus*

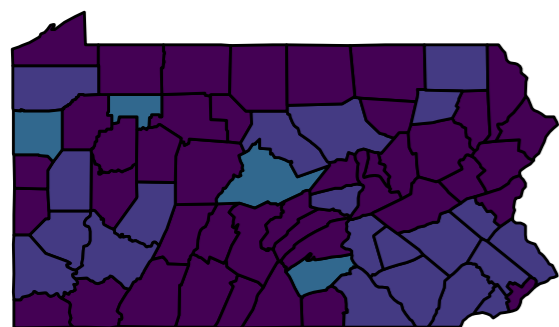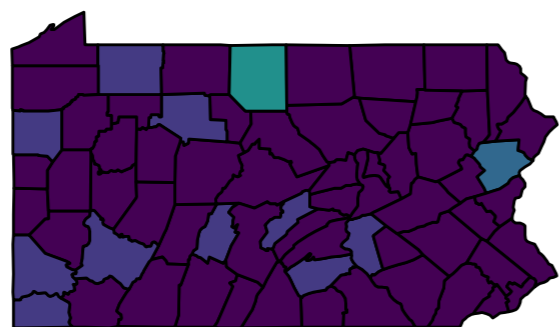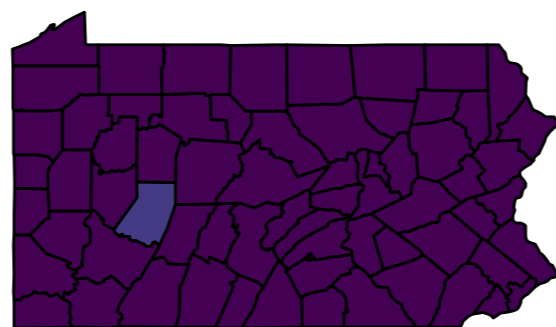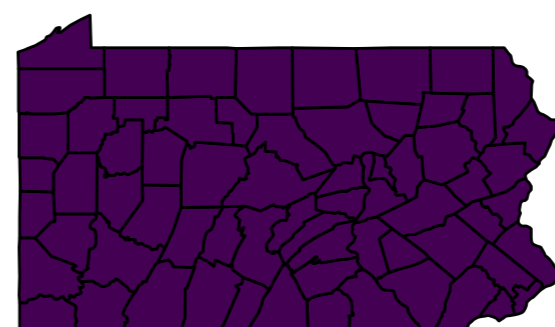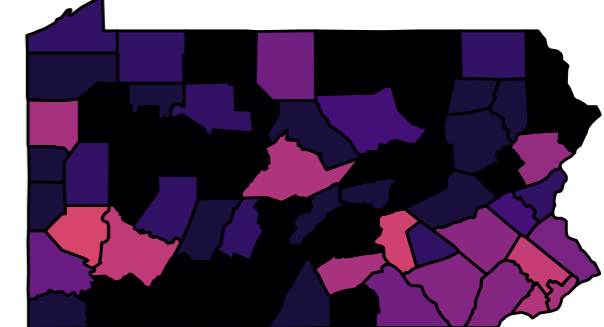

*I. scapularis*

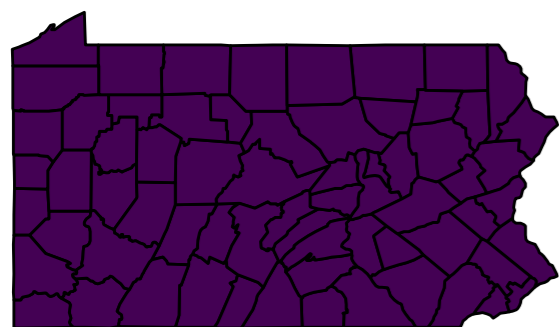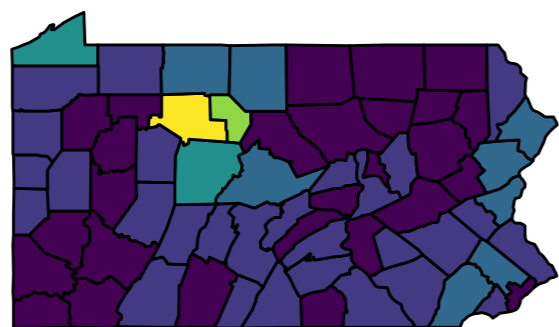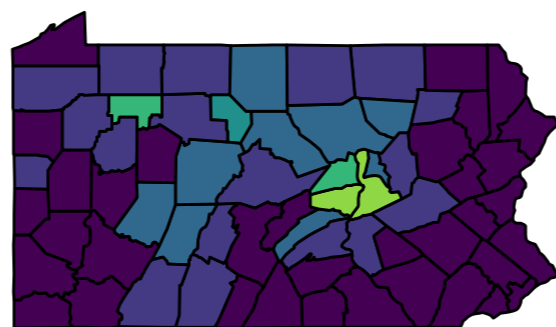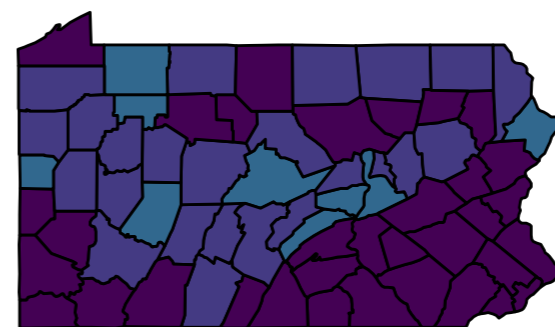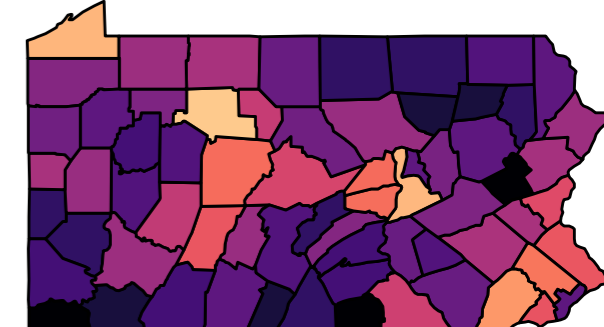

*D. variabilis*

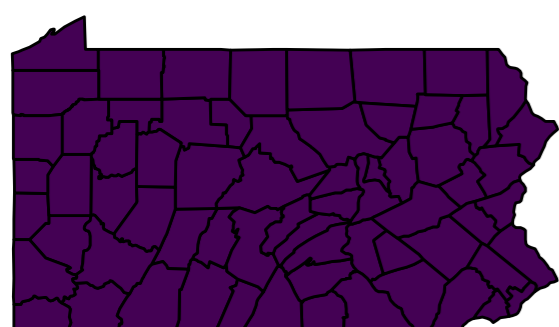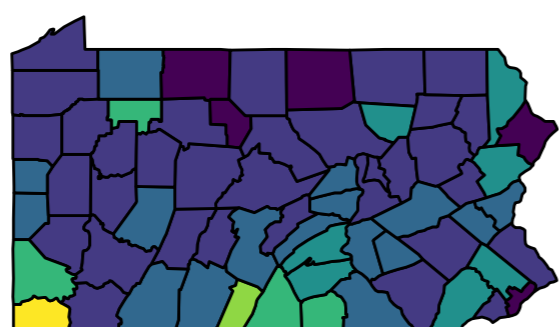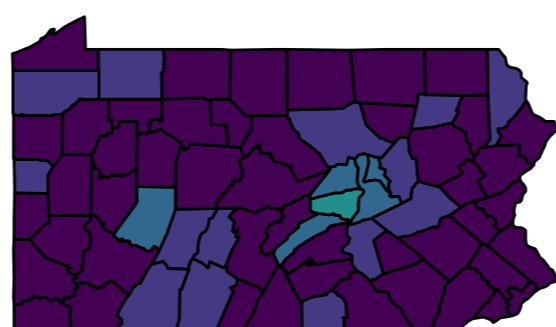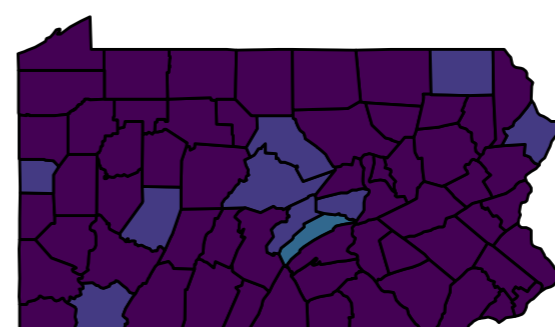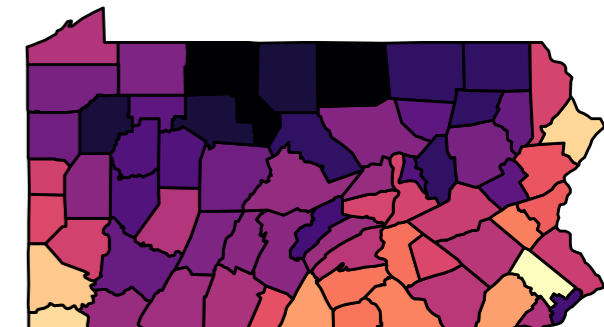

Incidence per 100,000 [0,1] (1,10] (10,40] (40,100] (100,200] (200,500] (500,1000]

Total individuals (log)

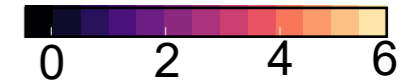

*Other Amblyomma species*

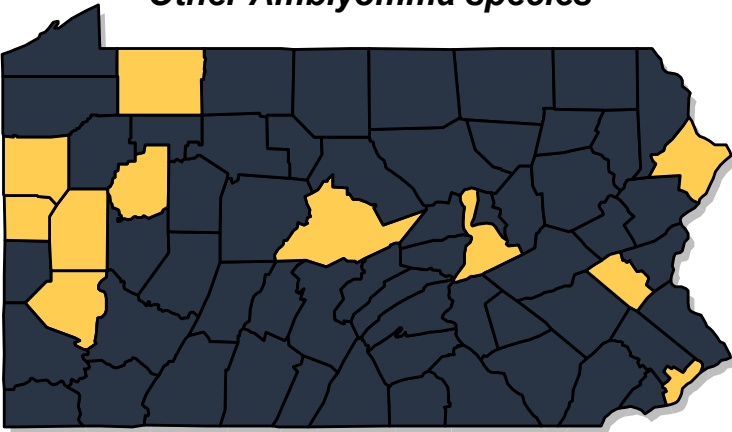

*Argas species*

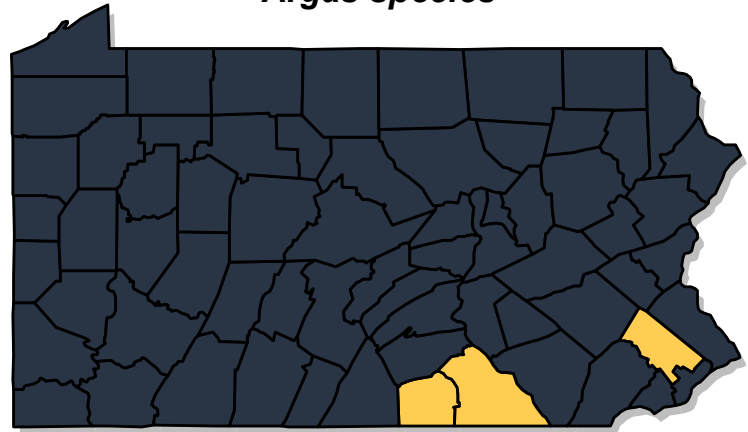

*Carios species*

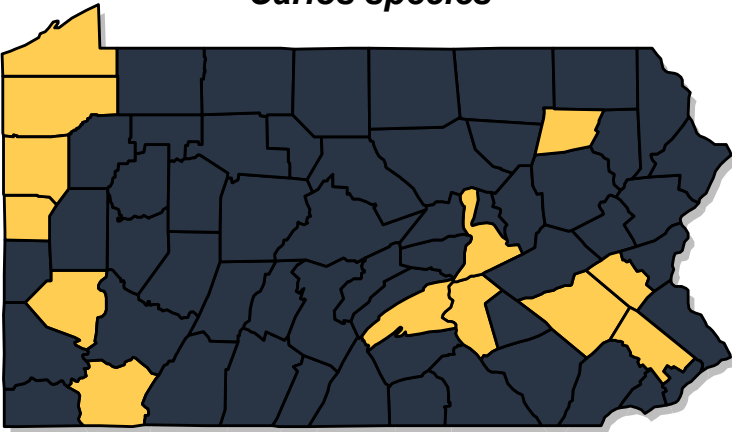

*Other Dermacentor species*

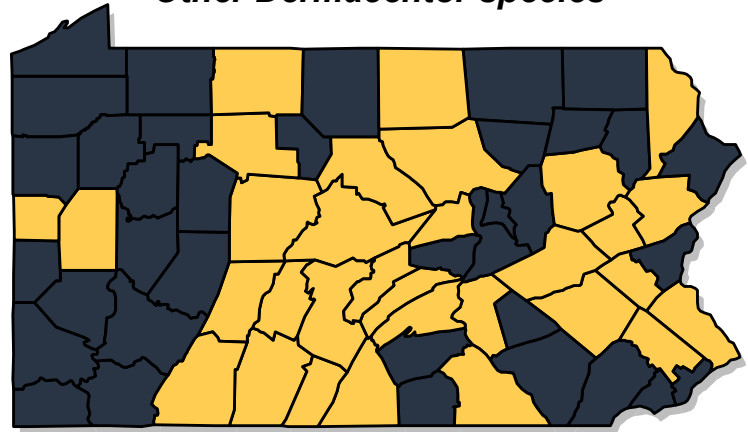

*Haemaphysalis species*

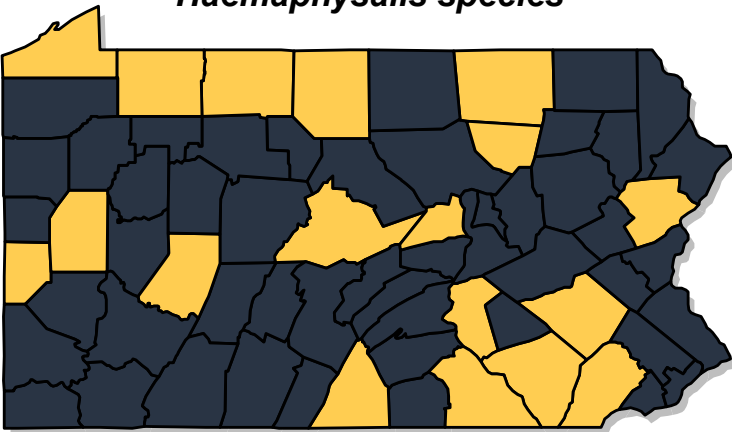

*Other Ixodes species*

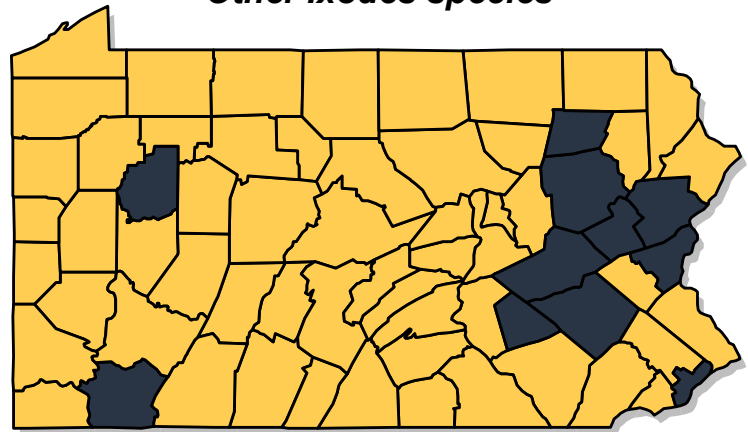

Presence  No  Yes

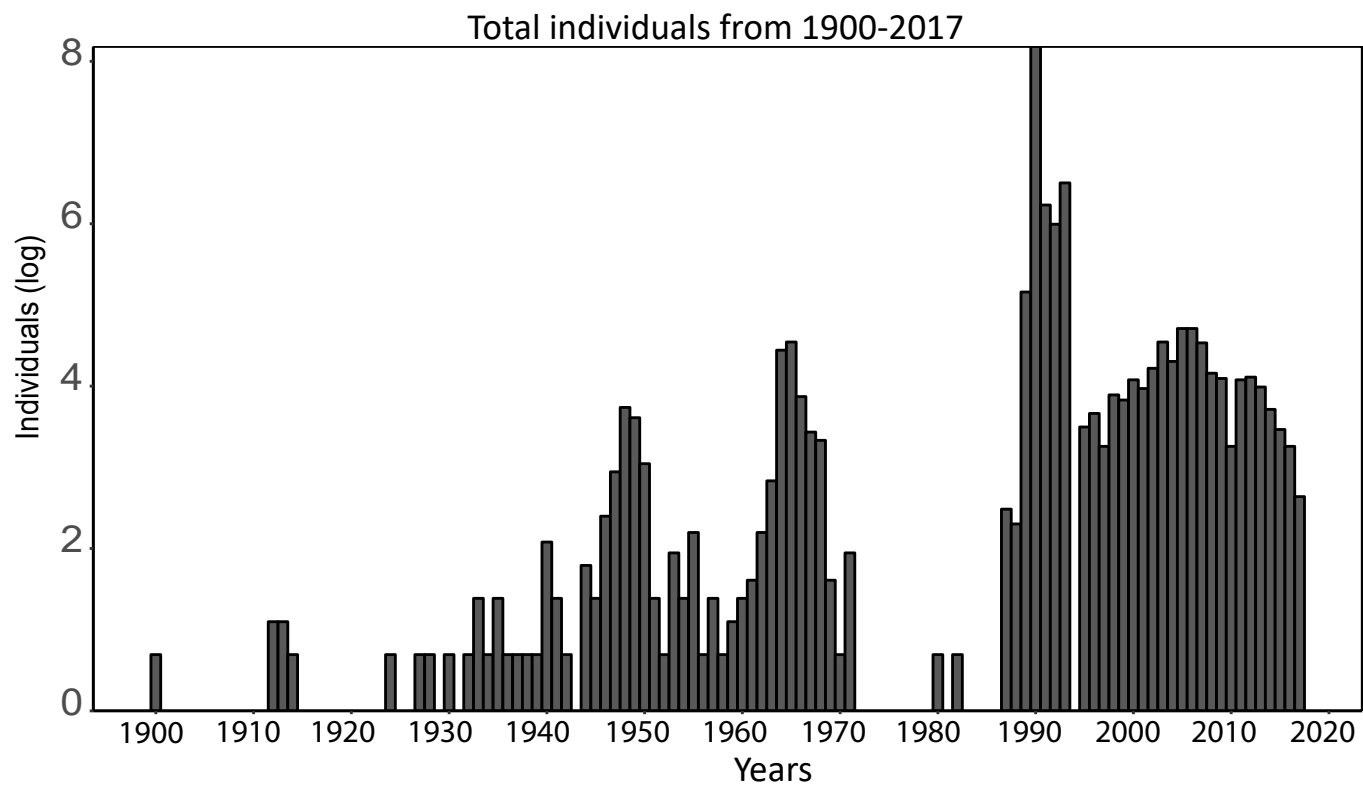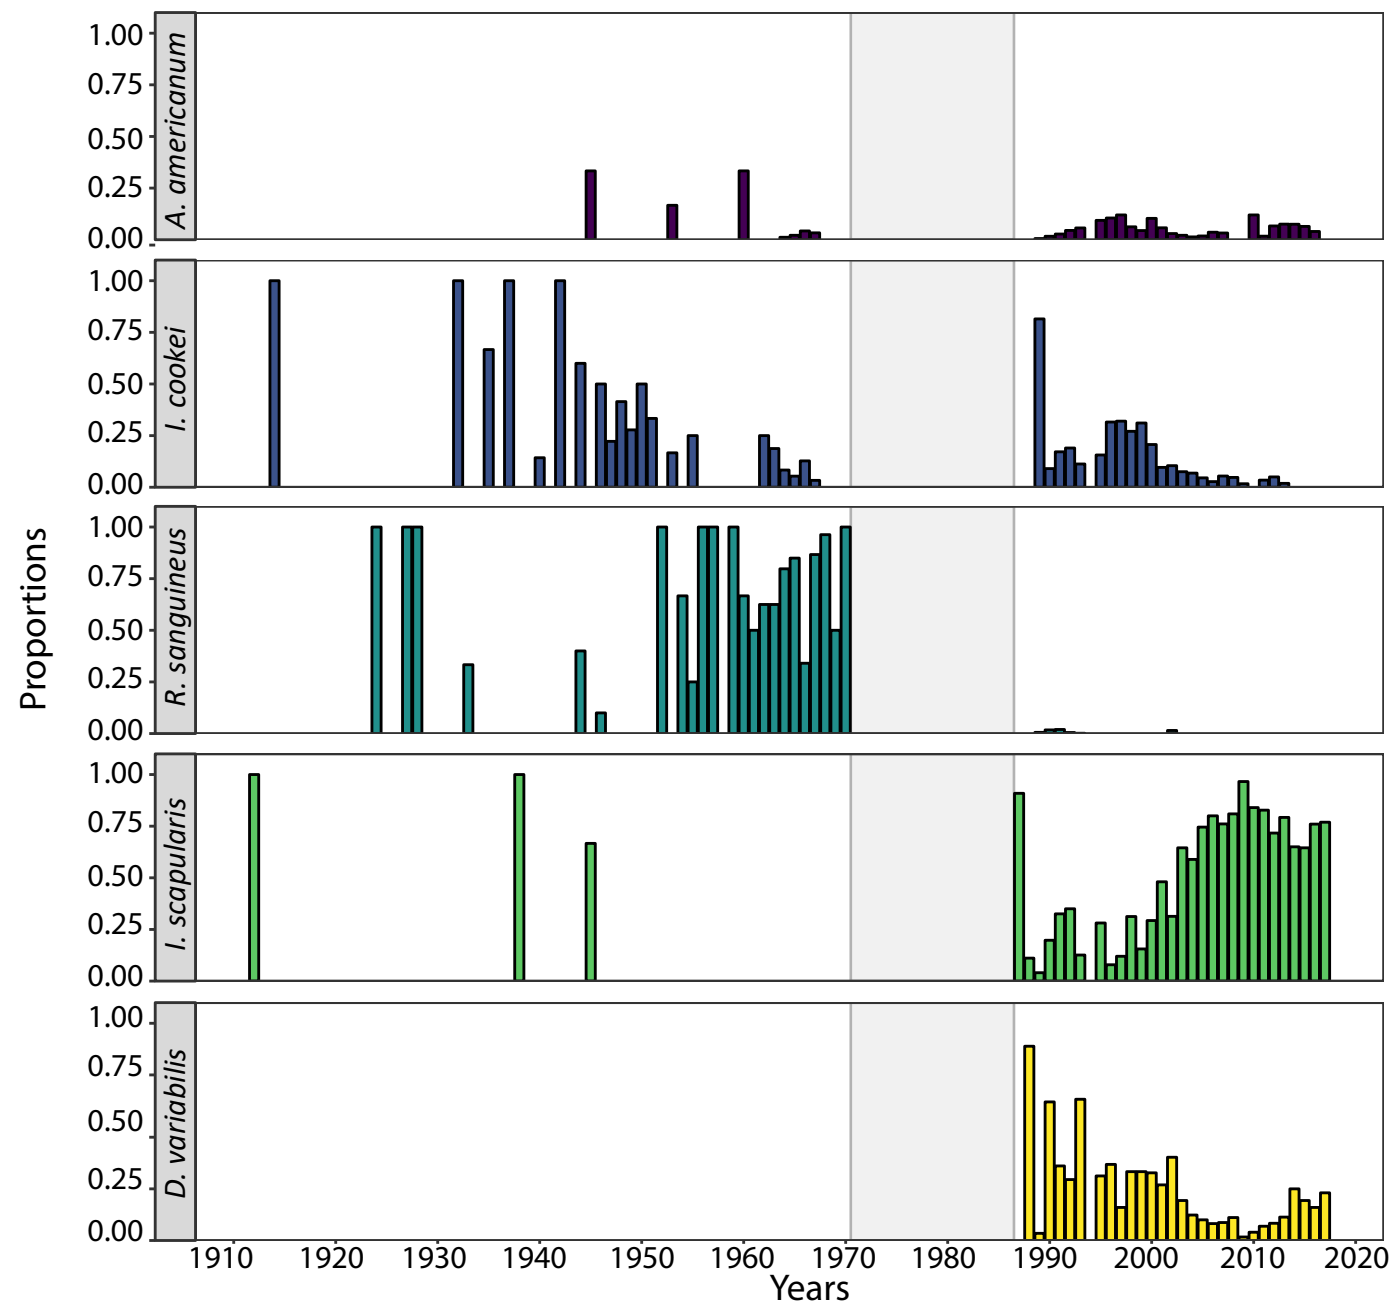

Proportions

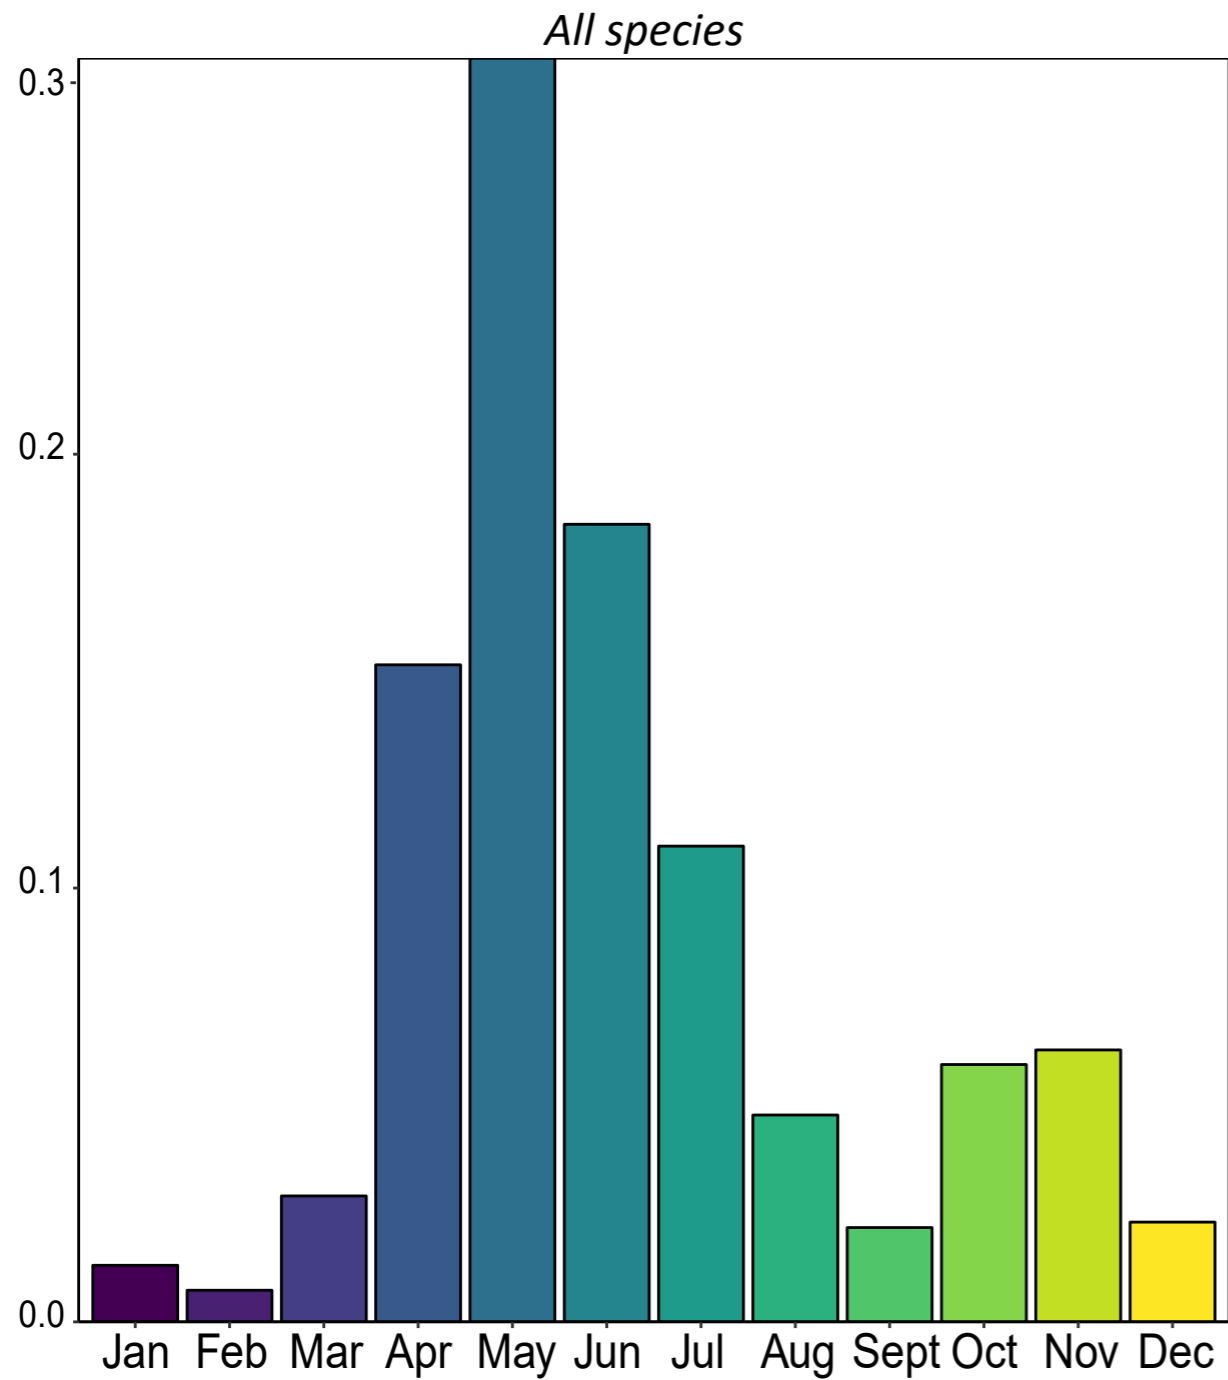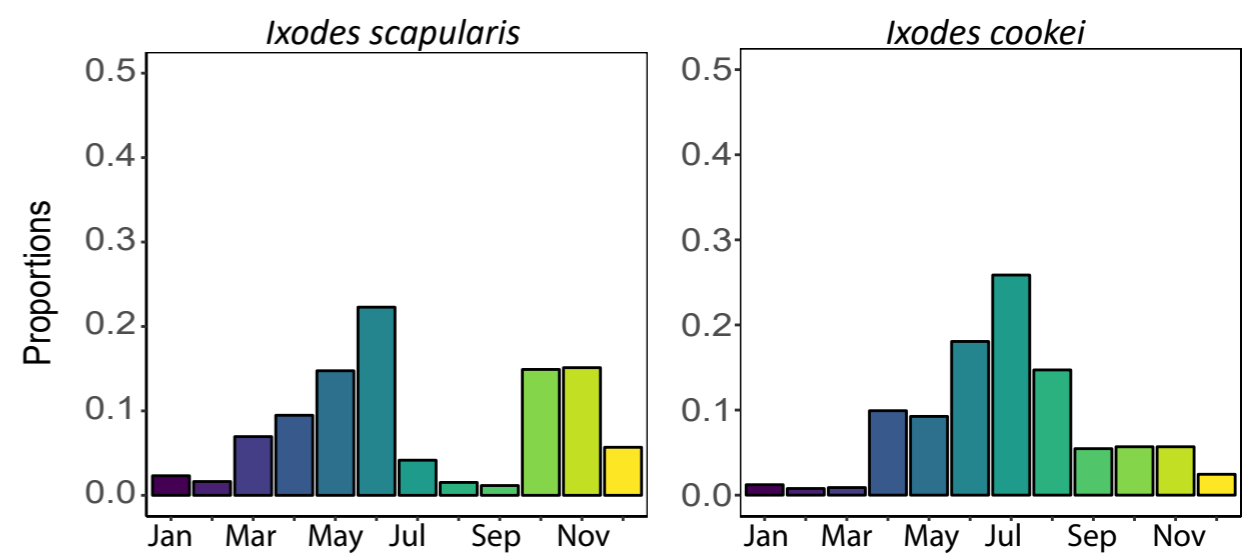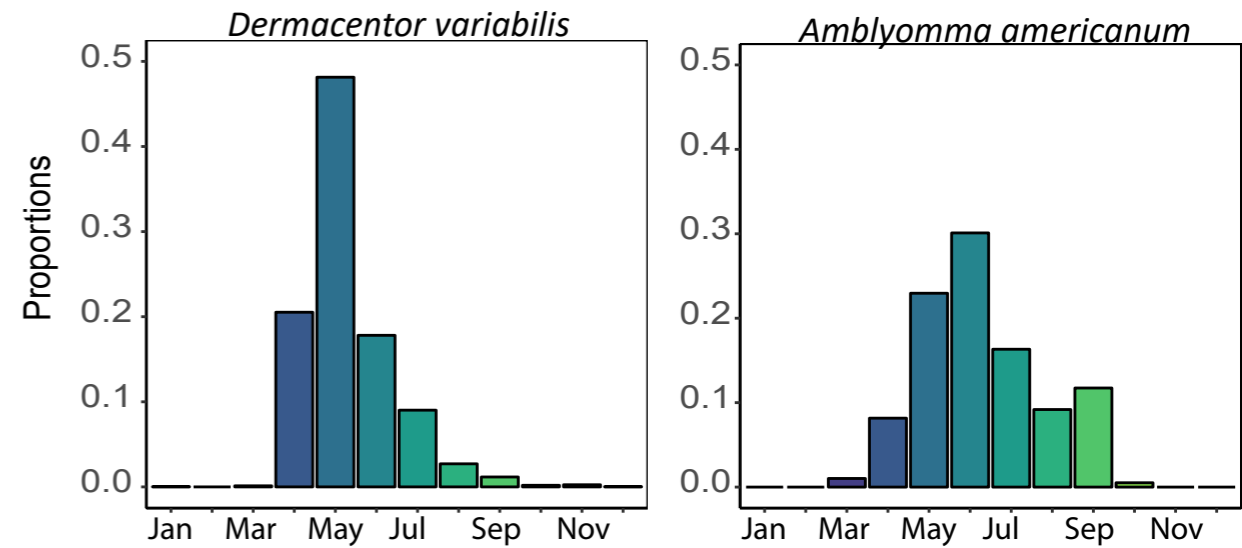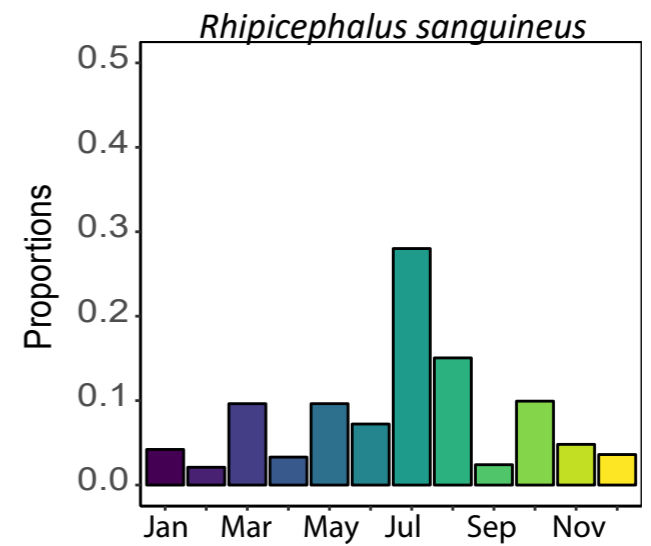

Monthly proportions of ticks submitted by decades (1900–2017)

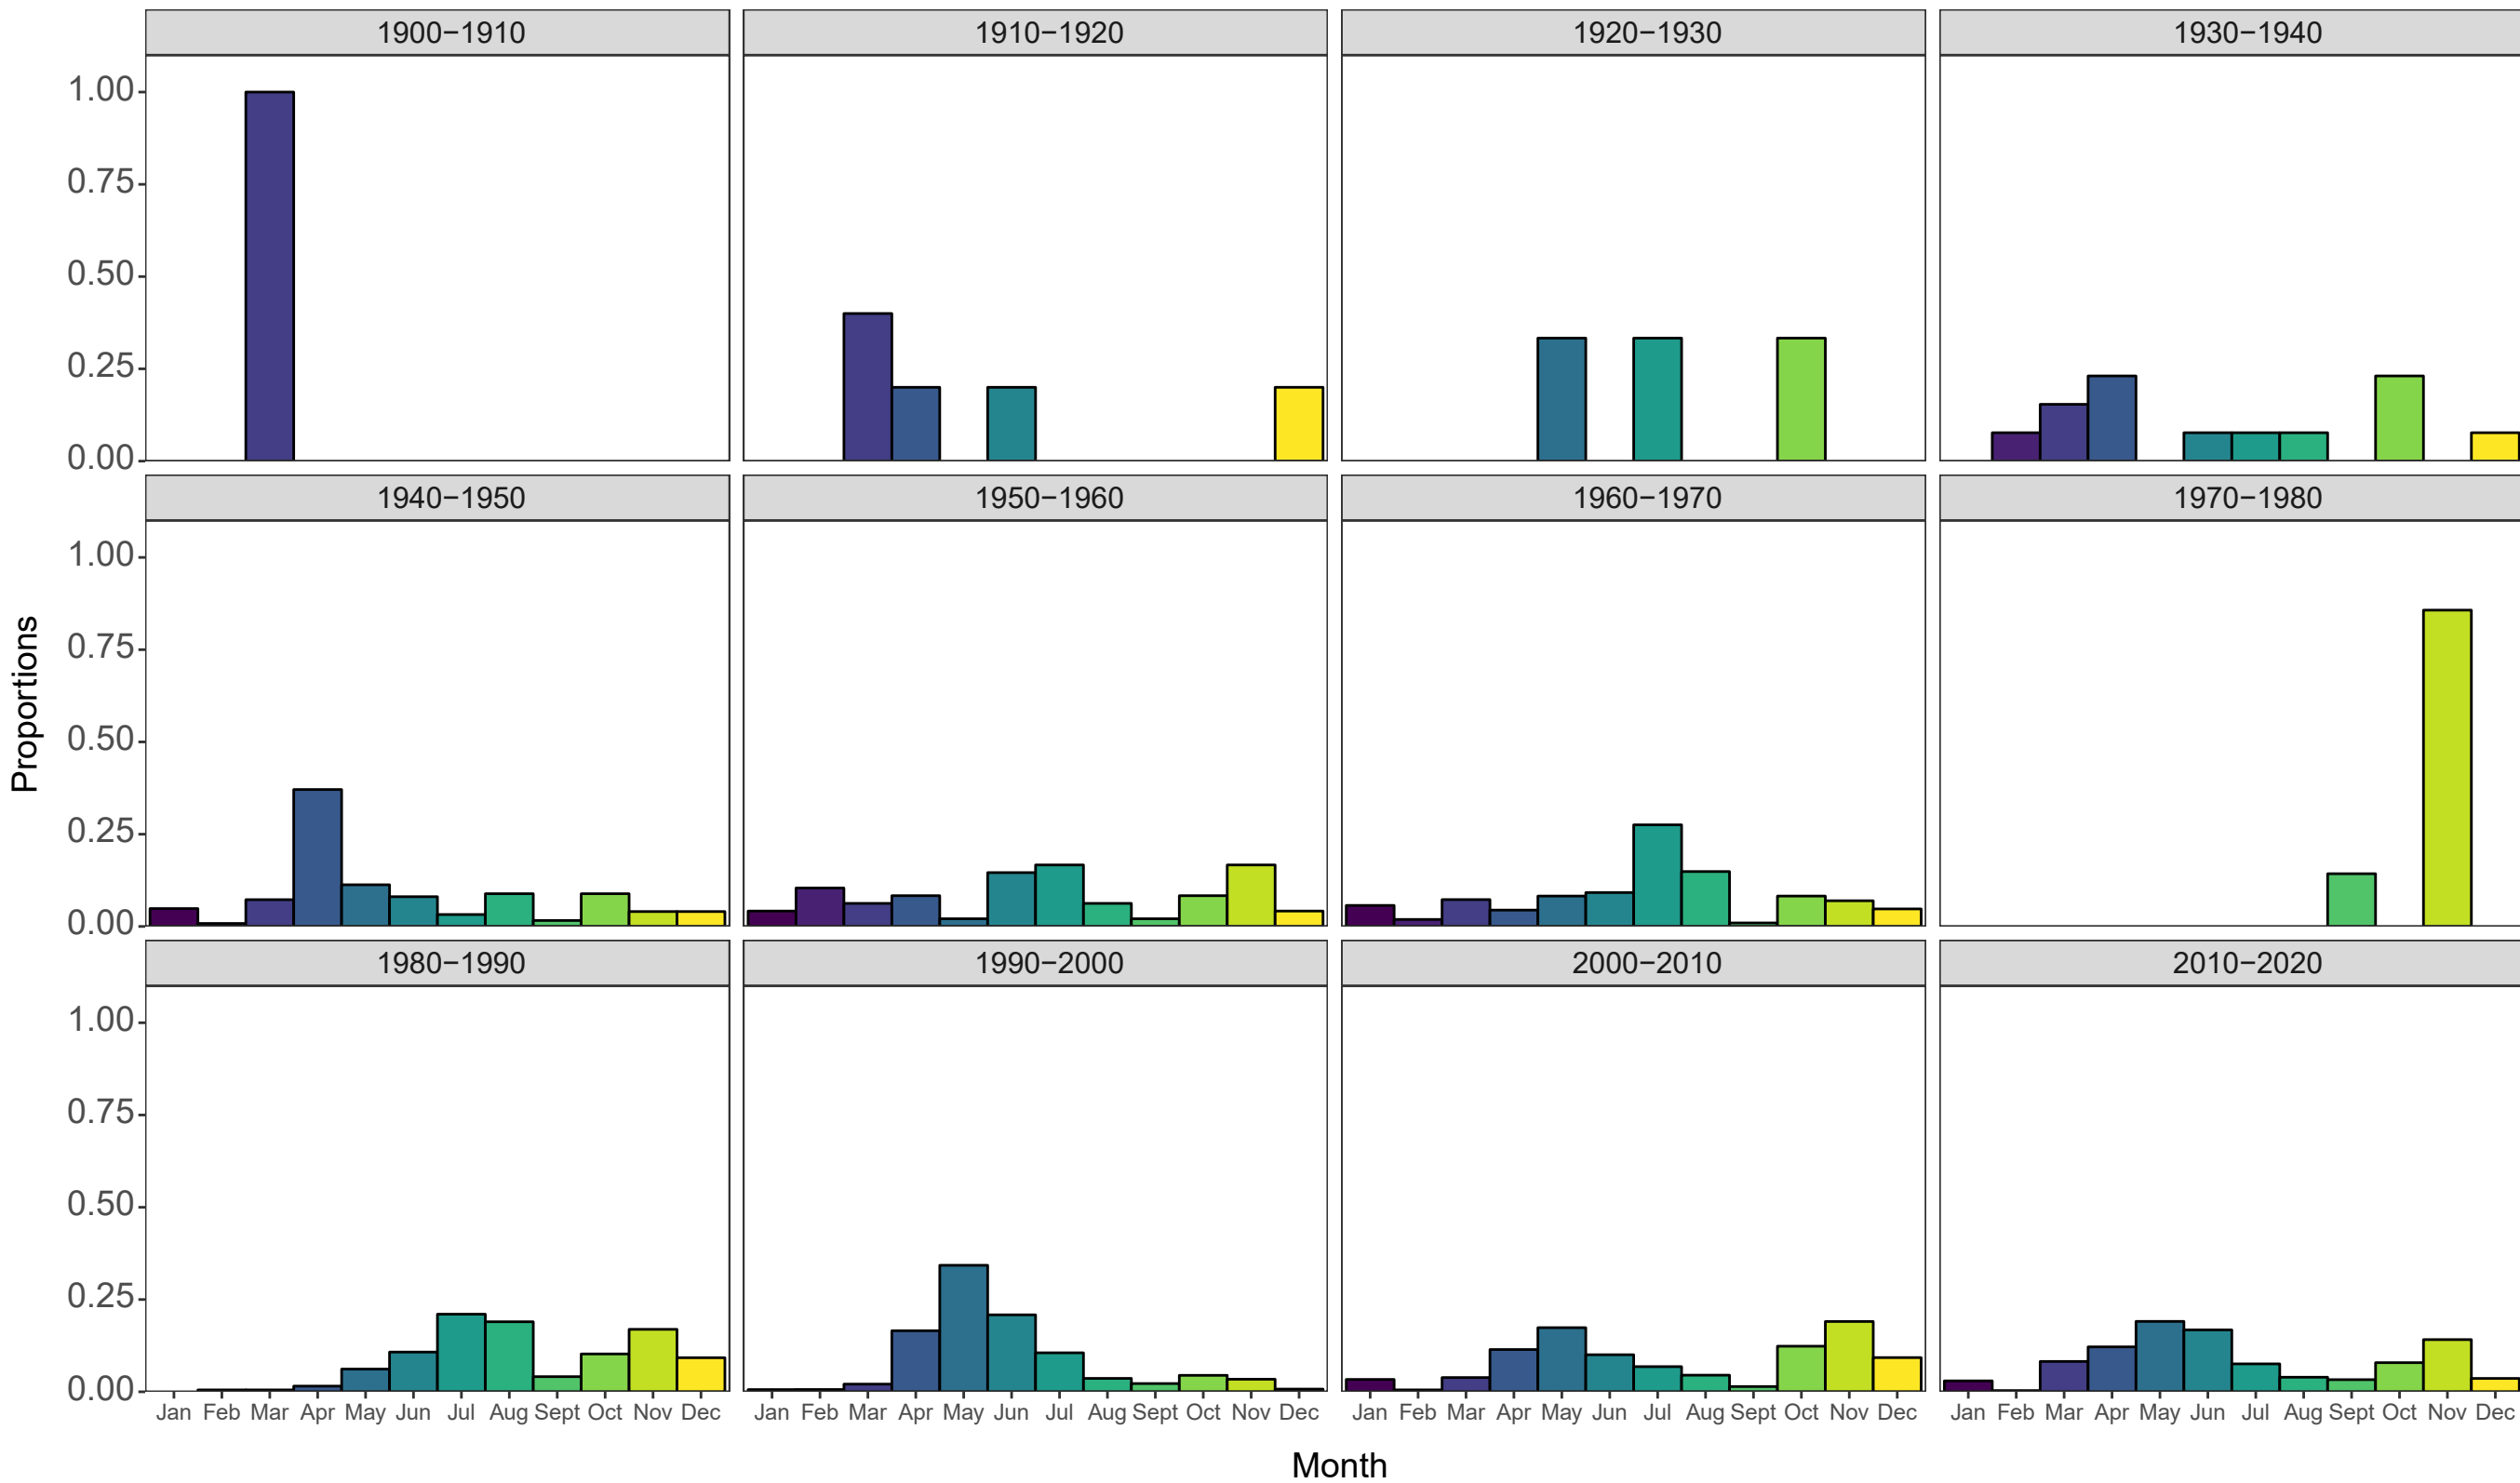



# *Dermacentor variabilis*

## Larvae

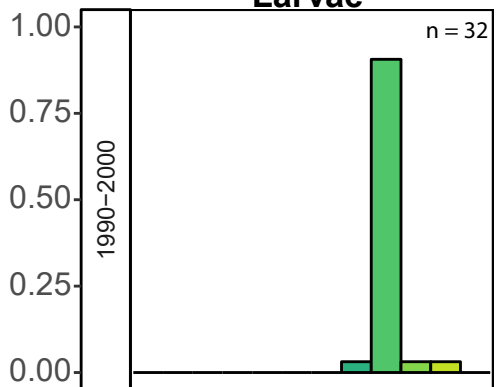

## Nymphs

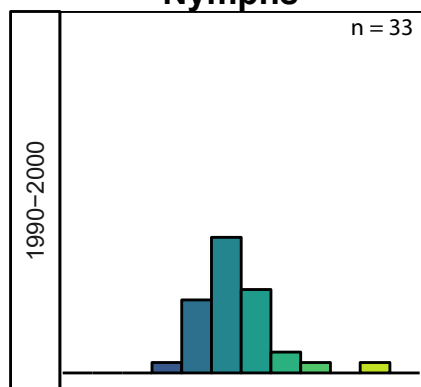

## Adults

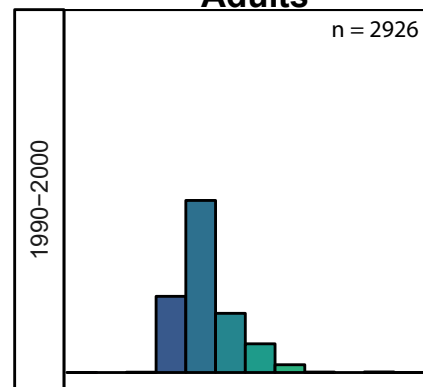

Proportion

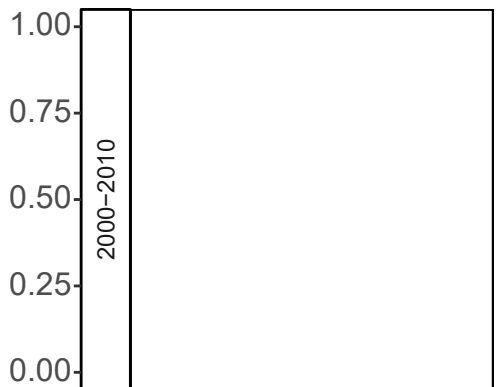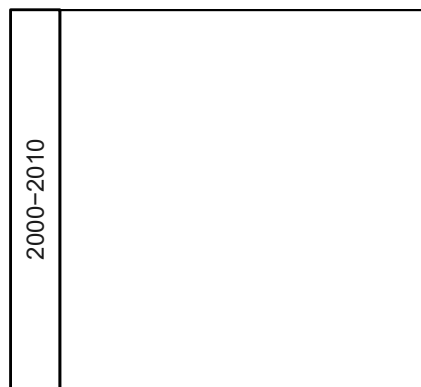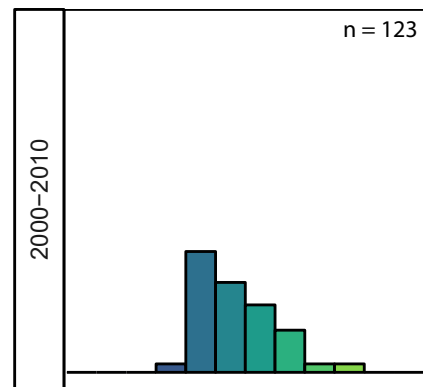

# *Ixodes scapularis*

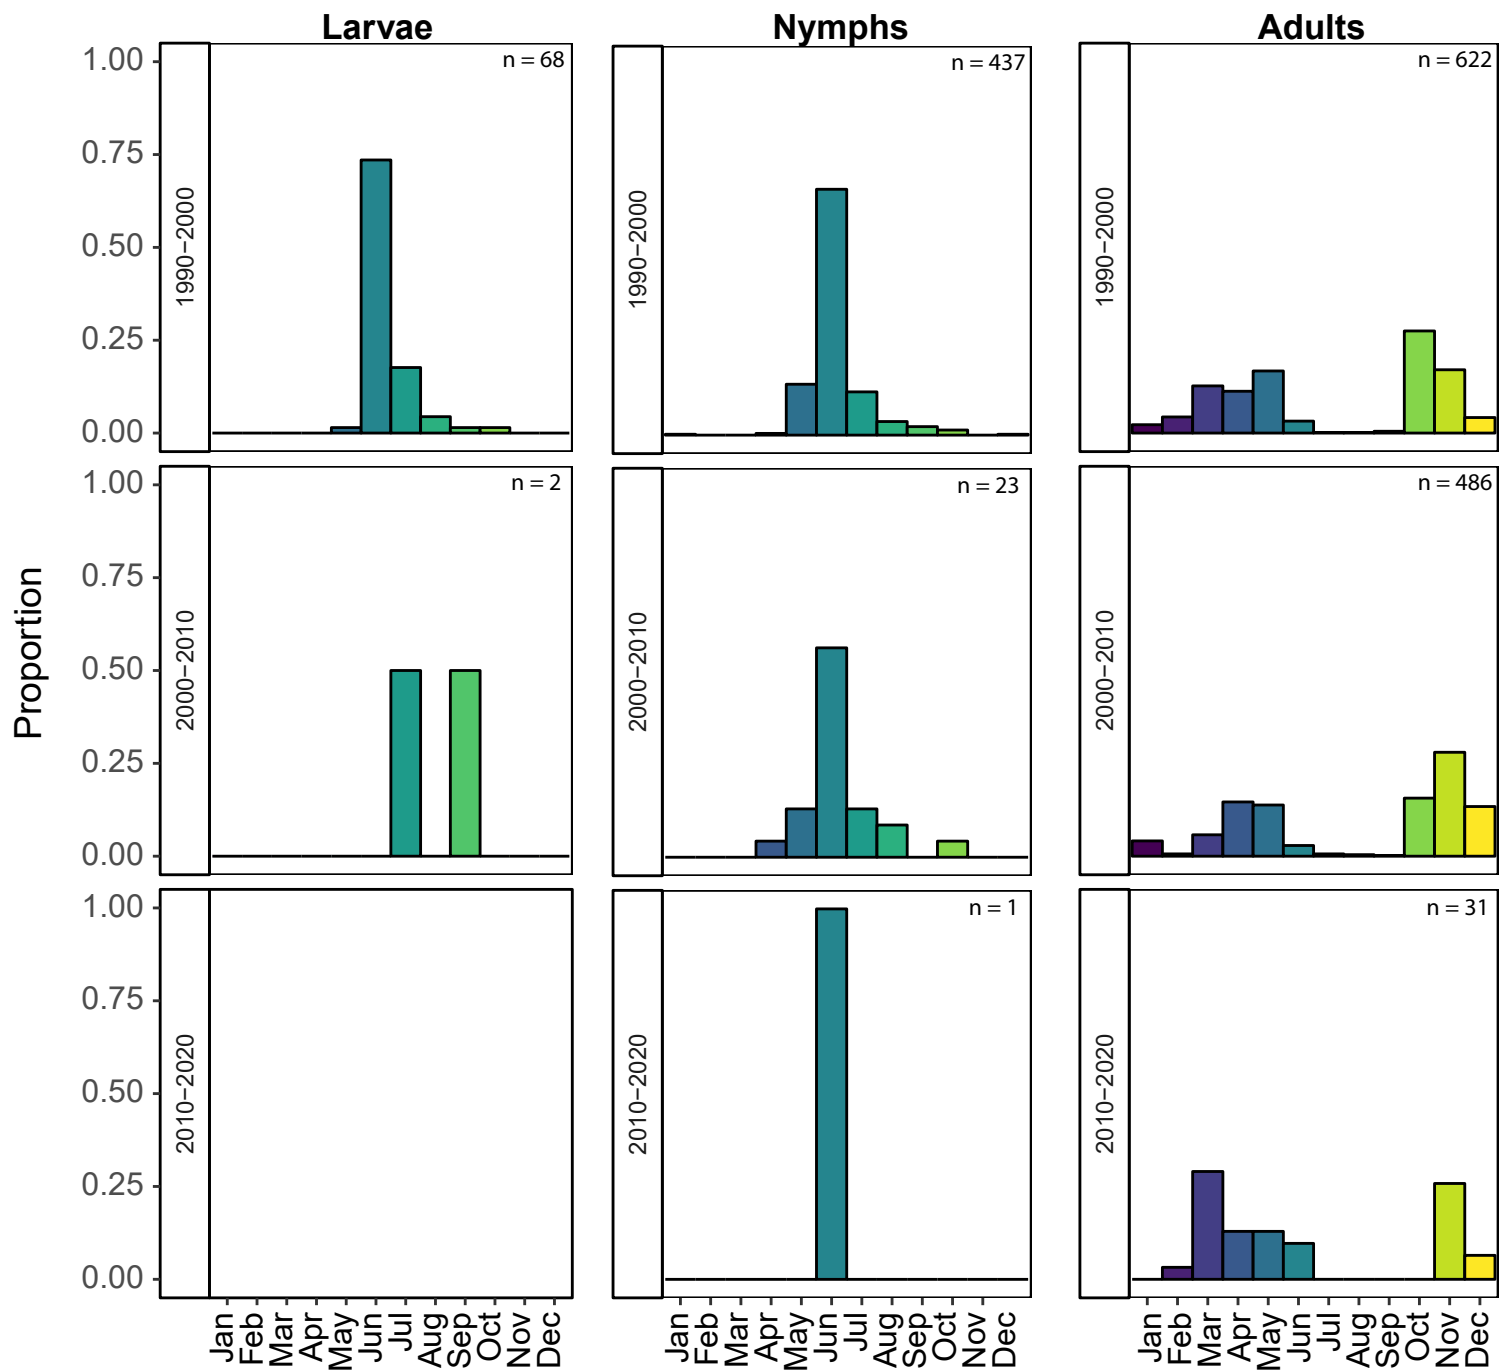

*Ixodes cookei*

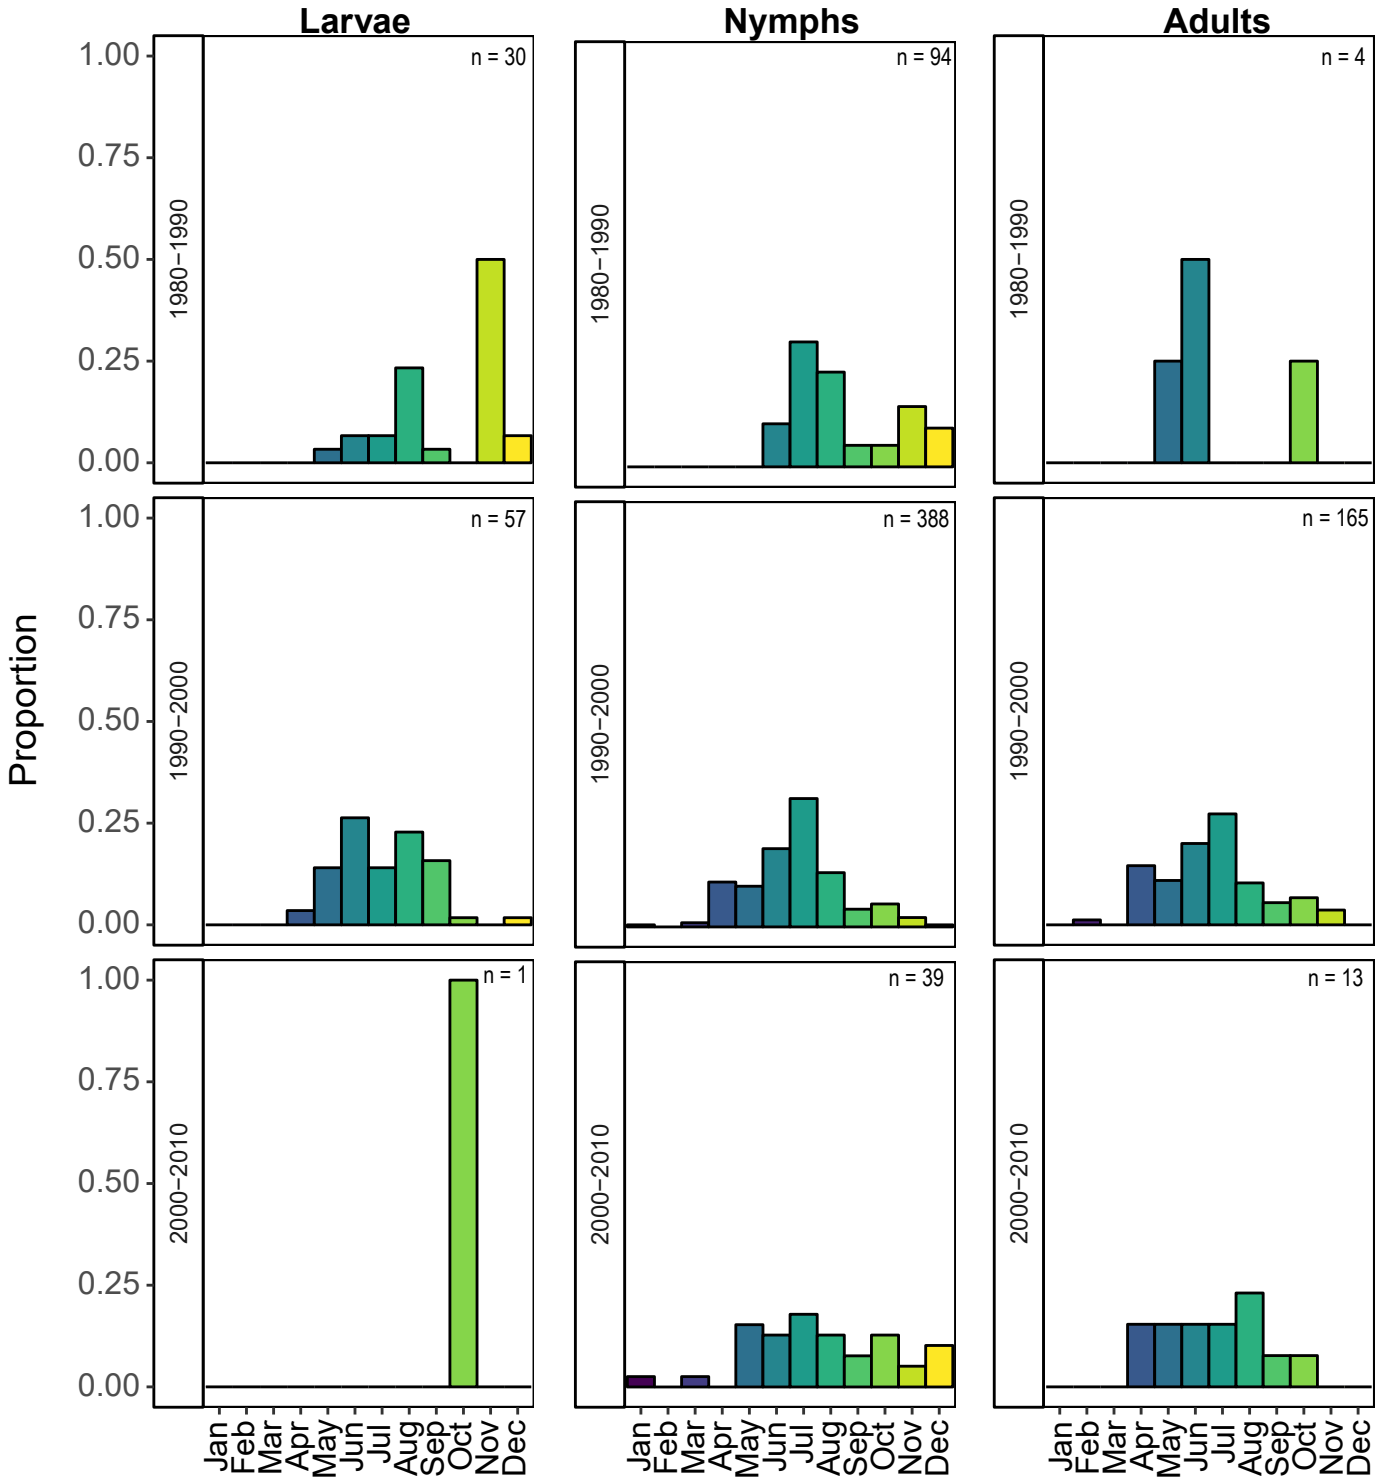

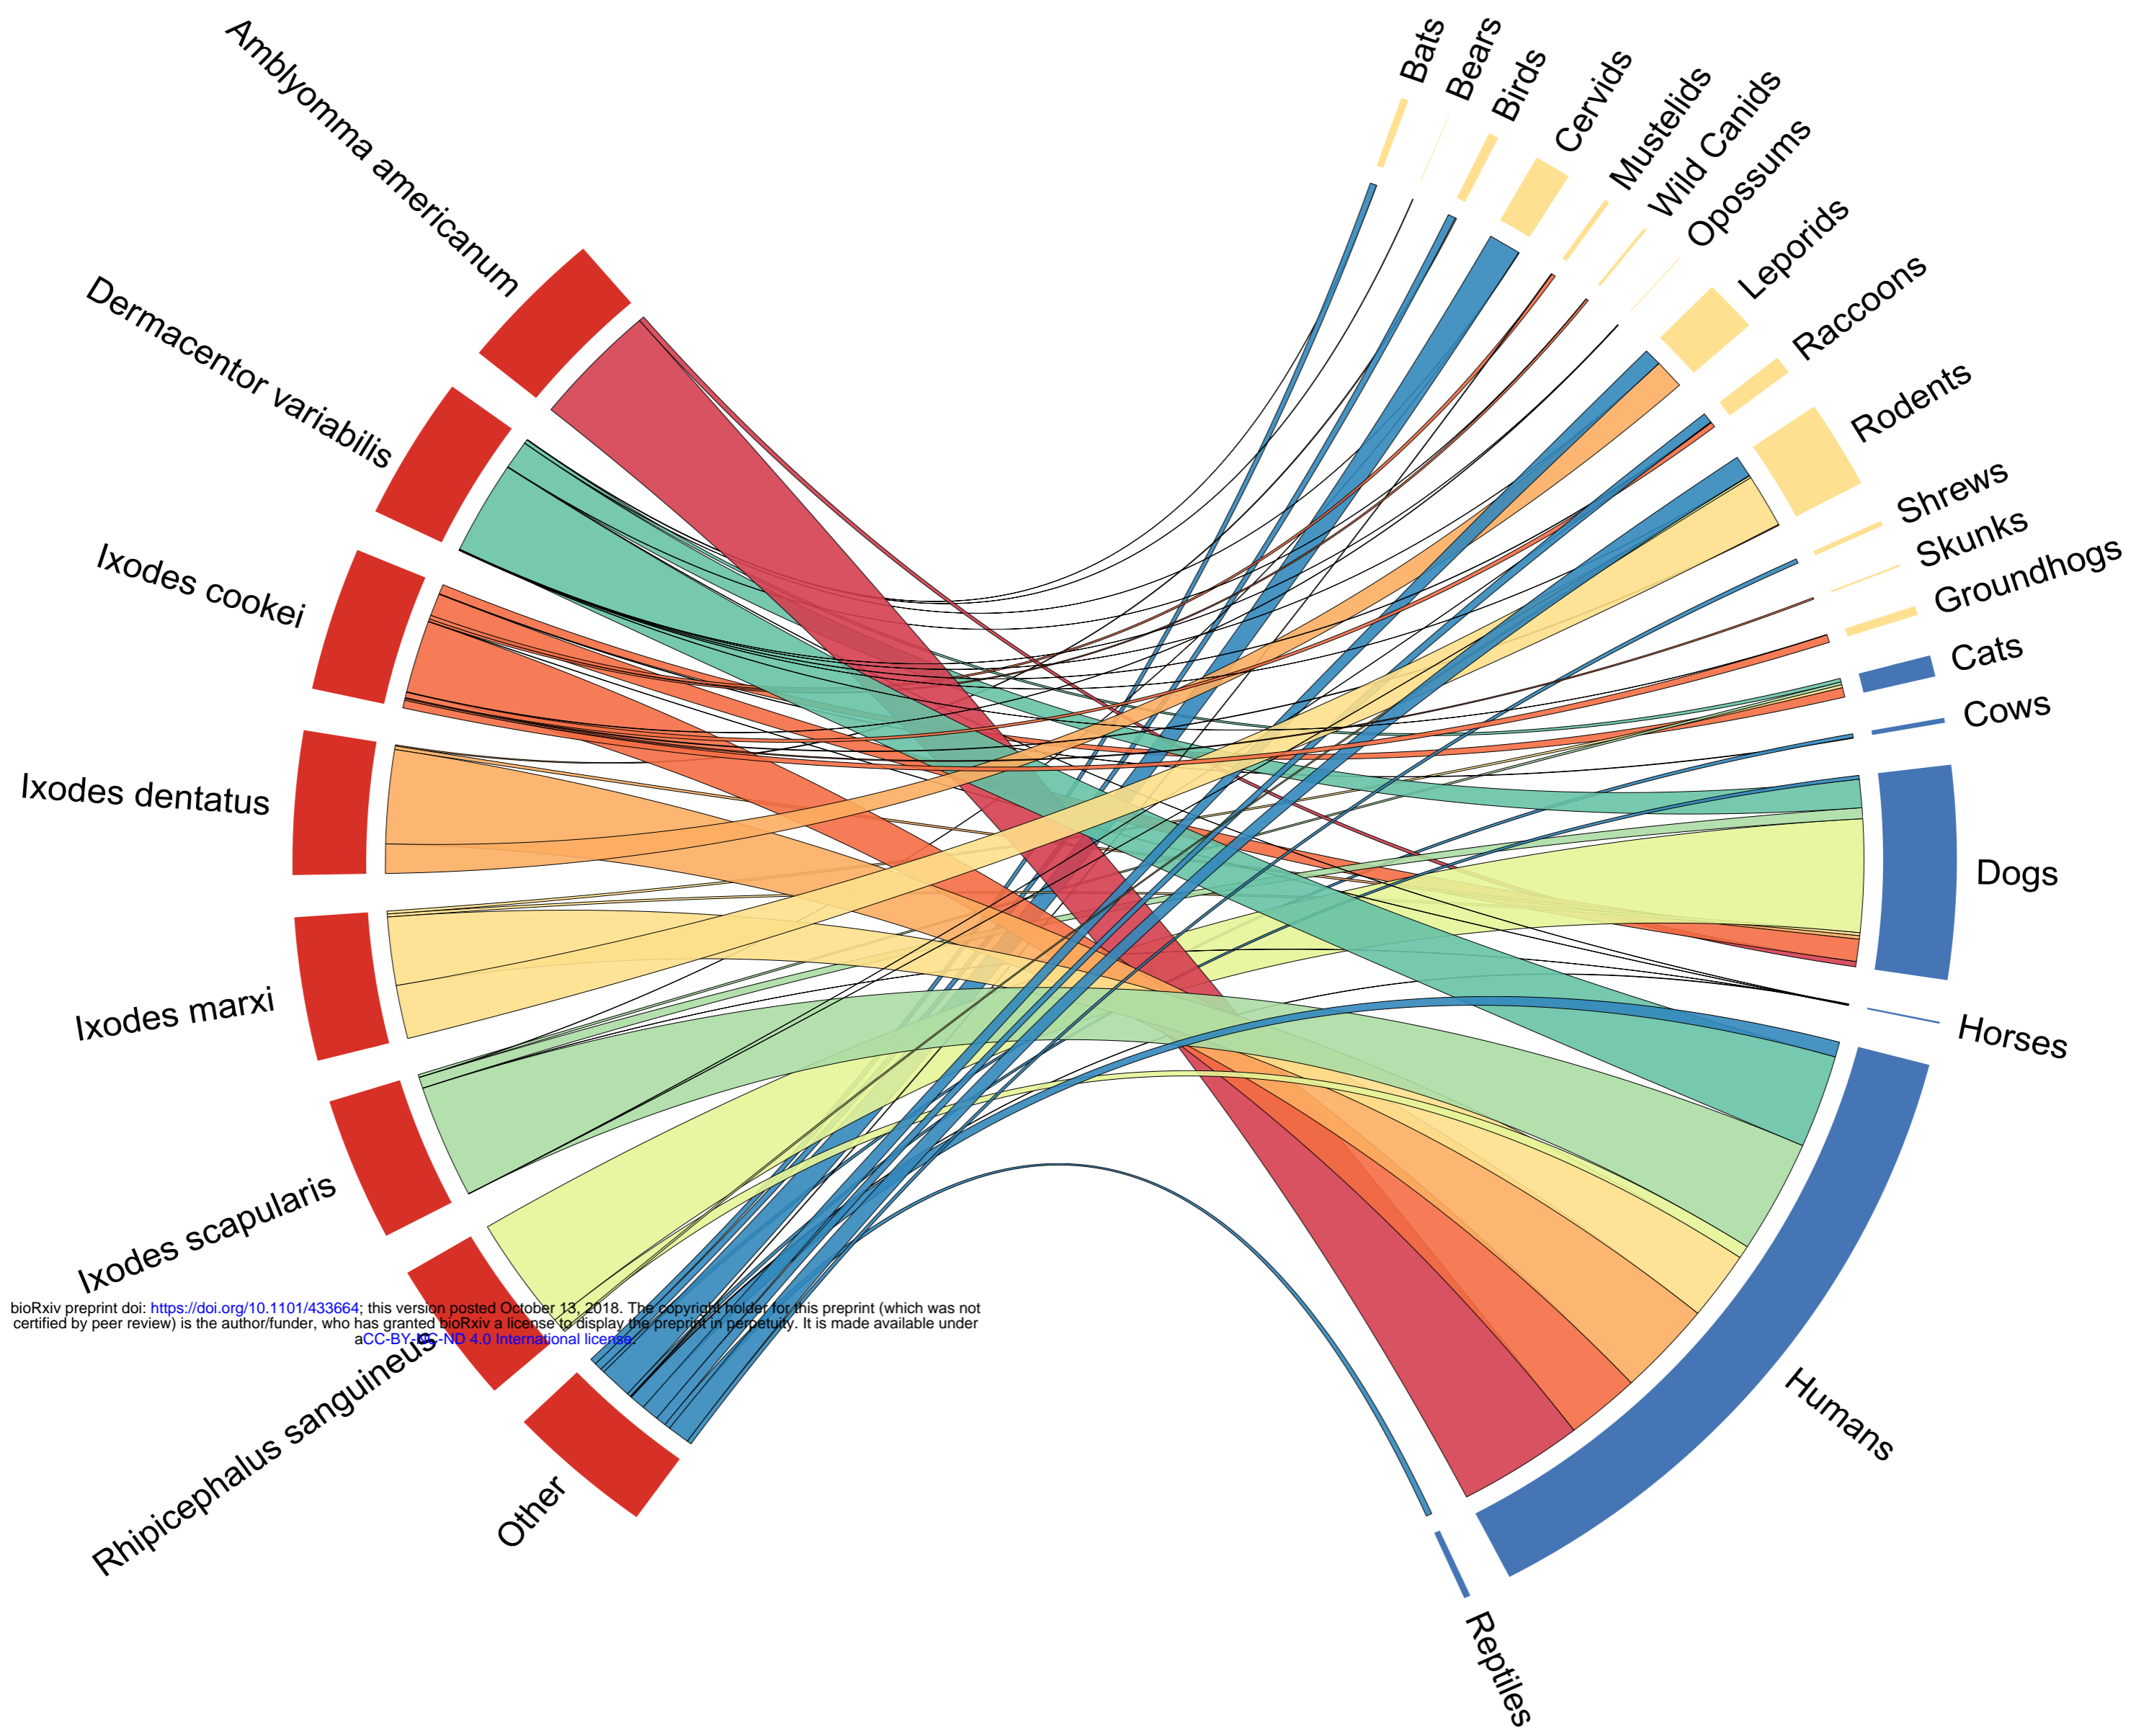

## Domestic

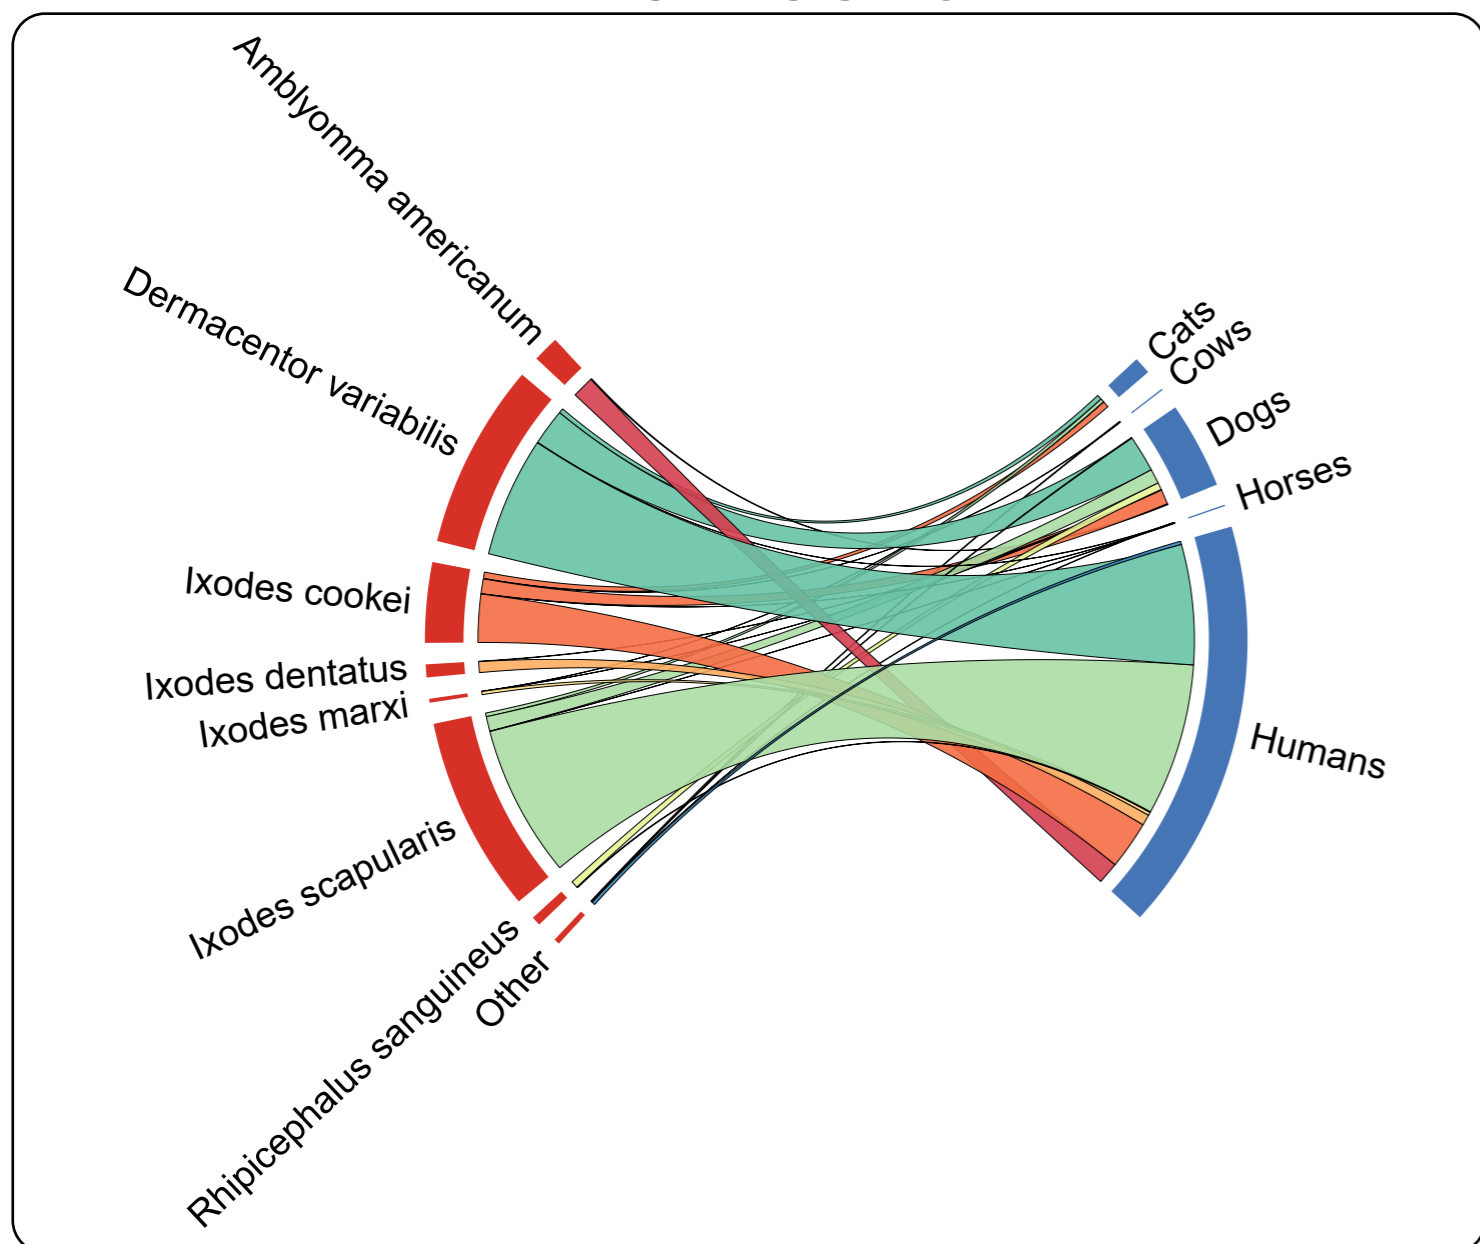

## Wildlife

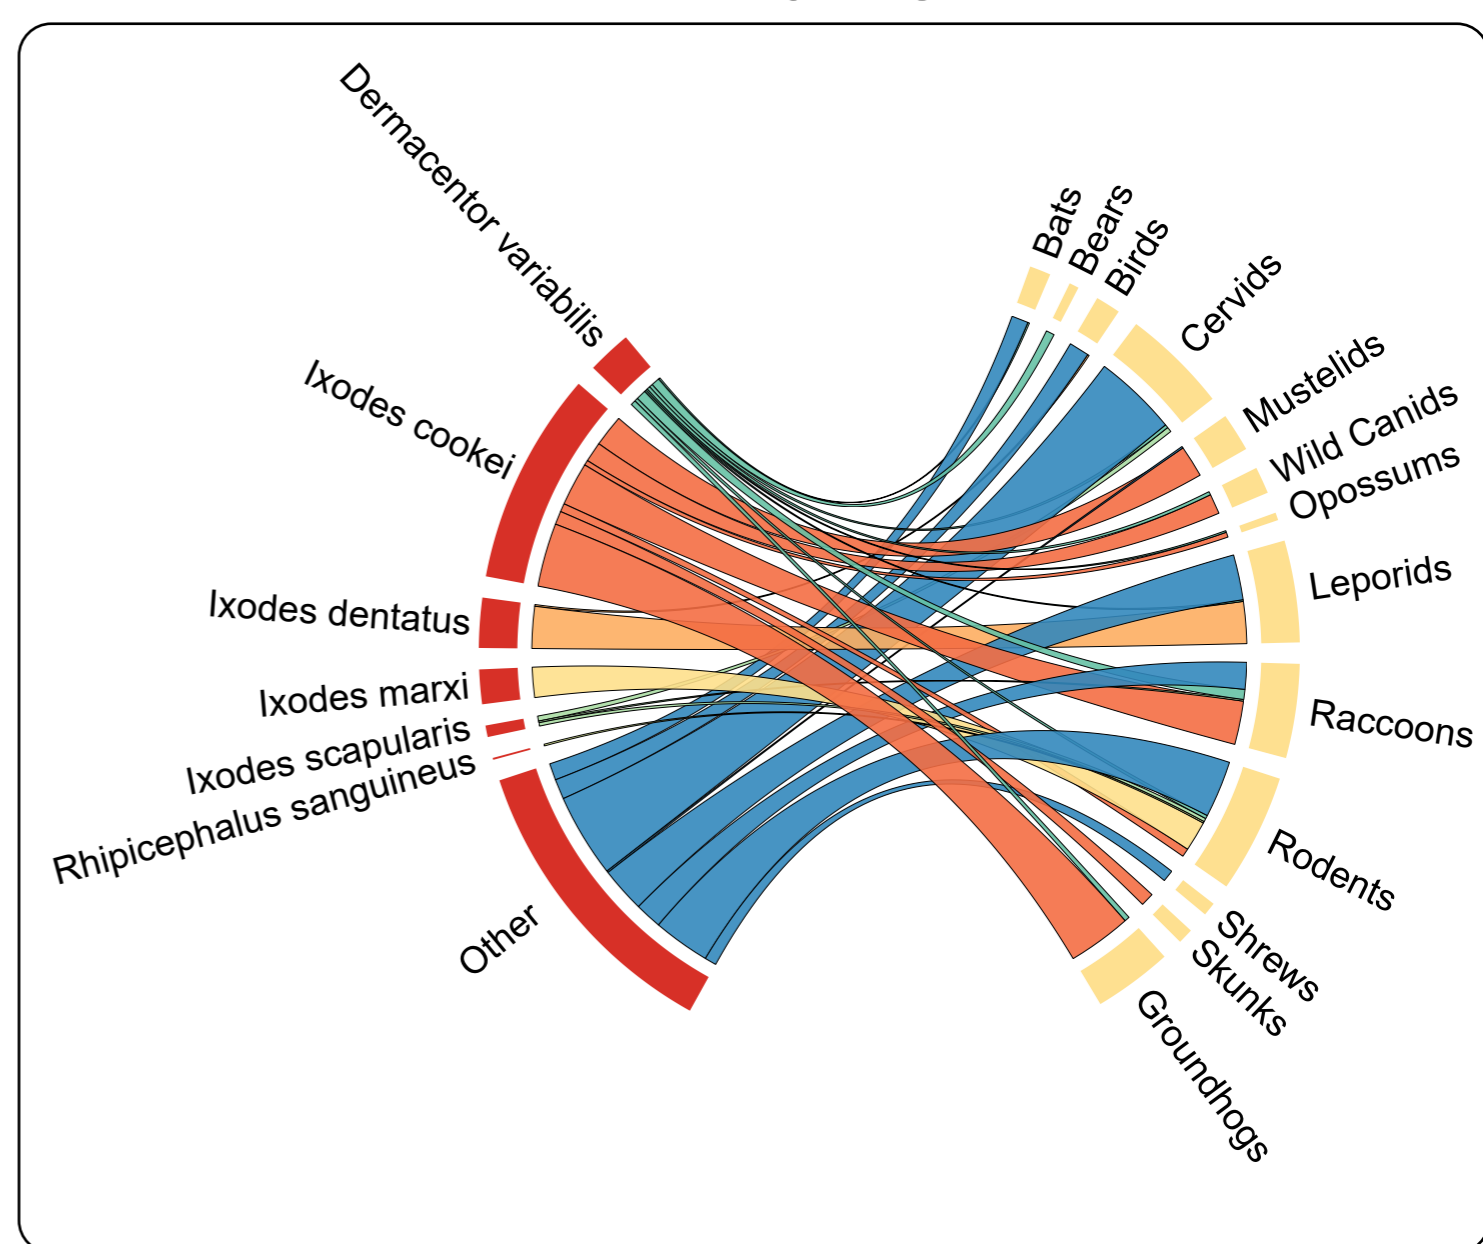

**Table 1:** The total submissions to the PSU Department of Entomology/Frost Entomological Museum from 1900 to 2017. Generic names that have been changed since the submission date are shown in parentheses. Specimens which were not identified to species were listed under the genus.

| <b>Species</b>                           | <b>#Submission lots</b> | <b>#Specimens</b> |
|------------------------------------------|-------------------------|-------------------|
| <i>Amblyomma americanum</i>              | 183                     | 196               |
| <i>Amblyomma cajennense</i>              | 1                       | 1                 |
| <i>Amblyomma dissimile</i>               | 8                       | 8                 |
| <i>Amblyomma longirostre</i>             | 1                       | 1                 |
| <i>Amblyomma maculatum</i>               | 5                       | 5                 |
| <i>Amblyomma (Aponomma) transversale</i> | 2                       | 2                 |
| <i>Amblyomma sp.</i>                     | 2                       | 2                 |
| <i>Argas cooleyi</i>                     | 2                       | 2                 |
| <i>Argas persicus</i>                    | 3                       | 3                 |
| <i>Carios (Ornithodoros) kelleyi</i>     | 18                      | 18                |
| <i>Dermacentor albipictus</i>            | 81                      | 107               |
| <i>Dermacentor andersoni</i>             | 1                       | 1                 |
| <i>Dermacentor variabilis</i>            | 1498                    | 3172              |
| <i>Haemaphysalis chordeilis</i>          | 1                       | 1                 |
| <i>Haemaphysalis leporispalustris</i>    | 38                      | 78                |
| <i>Ixodes affinis</i>                    | 1                       | 1                 |
| <i>Ixodes angustus</i>                   | 39                      | 39                |
| <i>Ixodes cookei</i>                     | 661                     | 897               |
| <i>Ixodes dentatus</i>                   | 115                     | 120               |
| <i>Ixodes marxi</i>                      | 46                      | 48                |
| <i>Ixodes muris</i>                      | 6                       | 6                 |
| <i>Ixodes scapularis</i>                 | 1395                    | 1899              |
| <i>Ixodes texanus</i>                    | 16                      | 111               |
| <i>Ixodes sp.</i>                        | 79                      | 80                |
| <i>Rhipicephalus sanguineus</i>          | 287                     | 332               |
| <i>Rhipicephalus sp.</i>                 | 1                       | 1                 |
| Not determined                           | 1                       | 1                 |
| <b>Total</b>                             | <b>4491</b>             | <b>7132</b>       |
